# Supplementary material for: Characterizing the Key Metabolic Pathways of the Neonatal Mouse Heart Using a Quantitative Combinatorial Omics Approach
Source: Front Physiol. 2018 Apr 11;9:365. doi: 10.3389/fphys.2018.00365 (PMC5904546; doi:10.3389/fphys.2018.00365)
Supplement: Supplementary file 8 [file Table7.XLSX]

## Sheet: Lalowski et al_S7 Table
Characterising the key metabolic pathways of the neonatal mouse heart using an untargeted quantitative combinatorial omics approach. Maciej Lalowski1,+,*, Susann Björk2,+, Piet Finckenberg2, Rabah Soliymani1, Miikka Tarkia2, Giulio Calza1, Daria Blokhina2, Sari Tulokas2, Matti Kankainen3,4, Päivi Lakkisto5, Marc Baumann1, Esko Kankuri2 & Eero Mervaala2 Affiliations 1 Helsinki Institute of Life Sc…
Ingenuity Canonical Pathways	-log(B-H p-value)	Ratio	z-score	Molecules
Axonal Guidance Signaling	6.37	0.168	NaN	BMP4,SEMA6B,NTN1,ADAMTS2,LIMK1,MAP2K2,MAPK3,ABLIM3,ABLIM2,IRS2,PLXNB2,FZD2,PIK3C2B,AKT2,FES,WNT9A,ARHGEF15,MMP2,PDGFB,PLCG2,PRKACA,PIK3R6,PLCB3,PRKCH,EPHA2,ADAMTS7,NTF3,RGS3,GNA11,VEGFB,FZD1,NGF,BCAR1,SEMA6C,SEMA4C,SHC1,GNG11,AKT1,TUBA8,SDC2,NGFR,EFNB1,NTNG2,ADAM19,SMO,ARPC3,TUBB4A,MMP11,SEMA3B,PIK3R2,SEMA3F,ACE,BMP1,SEMA3G,PLXNA1,PXN,EPHB4,PAK6,NRP2,ADAM15,CXCR4,ARPC5L,GNA12,TUBG1,TUBA4A,NFATC4,…
Wnt/β-catenin Signaling	4.55	0.208	0.756	SFRP2,SOX12,PPP2R5B,Ubb,GSK3A,KREMEN1,FZD1,SOX13,RARG,SOX17,TGFBR2,CSNK1E,AKT1,JUN,TGFB1,PPM1J,SMO,SOX18,FZD2,SOX4,SOX7,SRC,AKT2,LRP5,APPL2,CSNK1G2,WNT9A,DVL1,TCF3,FZD8,CDH5,TLE3,DVL3,UBC,LRP1,FZD7
Molecular Mechanisms of Cancer	4.55	0.161	NaN	RAP2B,BMP4,ADCY4,CDKN2C,ARHGEF1,GSK3A,TGFBR2,RHOG,BBC3,MAP2K2,RHOB,TGFB1,MAPK3,IRS2,SMAD1,FZD2,RALGDS,PIK3C2B,AKT2,WNT9A,ARHGEF15,RALB,RHOJ,RAPGEF3,ARHGEF17,NFKB2,MAPK12,TCF3,ADCY9,PRKACA,PIK3R6,PLCB3,PRKCH,ARHGEF18,NOTCH1,RELA,NFKBIE,GNA11,PSEN2,FZD1,SHC1,NFKBIA,JUN,AKT1,SMO,PIK3R2,BMP1,CAMK2B,SRC,LRP5,PAK6,GNA12,DVL1,FADD,GNAI2,FZD8,FOS,ARHGEF5,CDKN1A,CDKN1B,LRP1,FZD7
Colorectal Cancer Metastasis Signaling	4.17	0.178	5.947	RELA,MMP14,ADCY4,MMP15,VEGFB,FZD1,TGFBR2,RHOG,ARRB1,GNG11,AKT1,JUN,MAP2K2,RHOB,TGFB1,MAPK3,SMO,MMP11,IRS2,PIK3R2,NOS2,FZD2,RALGDS,PIK3C2B,SRC,AKT2,LRP5,MMP28,TNFRSF1A,WNT9A,DVL1,RHOJ,MMP2,IFNGR1,NFKB2,MAPK12,TCF3,ADCY9,FZD8,FOS,MMP23B,PRKACA,PIK3R6,LRP1,FZD7
Notch Signaling	4.09	0.368	1.667	FURIN,NOTCH3,JAG2,DTX3,DTX4,MFNG,PSEN2,HES1,NOTCH4,LFNG,HEY2,NOTCH1,DLL4,HEY1
Signaling by Rho Family GTPases	3.7	0.172	4.964	RELA,PPP1R12C,MAP3K11,SEPT9,GNA11,ARHGEF1,CDC42EP2,LIMK1,STMN1,RHOG,GNG11,JUN,MAP2K2,RHOB,MAPK3,ARPC3,CDC42EP1,IRS2,PIK3R2,CDH13,PIK3C2B,SEPT8,PAK6,ARPC5L,GNA12,ARHGEF15,CDC42EP3,RHOJ,ARHGEF17,CDC42EP4,NFKB2,MAPK12,DES,MYL1,GNAI2,ARHGEF5,FOS,CDH5,ACTA2,PIP5K1C,PIK3R6,ARHGEF18,PIP4K2C
RAR Activation	3.22	0.178	NaN	RELA,RDH10,ADCY4,SMARCD2,RARG,RBP1,TNIP1,AKT1,JUN,TGFB1,PNRC1,SORBS3,SMARCC2,PIK3R2,MAPKAPK2,SMAD1,CITED2,SRC,DHRS3,AKT2,CSK,RELB,SMARCD1,NFKB2,MAPK12,ADCY9,FOS,RXRG,RBP7,GTF2H4,DUSP1,ALDH1A2,PRKACA,PRKCH,RXRA
Inhibition of Matrix Metalloproteases	3.22	0.325	NaN	MMP23B,SDC1,MMP28,SDC2,MMP14,MMP15,THBS2,MMP2,MMP11,A2M,LRP1,Hspg2,TIMP2
Adipogenesis pathway	3.22	0.2	NaN	BMP4,SAP30L,HDAC10,FZD1,RBP1,CTNNBIP1,CTBP1,LPIN1,AKT1,TGFB1,HDAC11,SMO,FZD2,SMAD1,ARNTL,HDAC4,TNFRSF1A,TXNIP,XBP1,NFATC4,HDAC5,FZD8,SIRT2,GTF2H4,DLK1,FGFRL1,FZD7
Production of Nitric Oxide and Reactive Oxygen Species in Macrophages	3.19	0.175	3.888	APOE,RELA,MAP3K11,NFKBIE,PPP2R5B,LYZ,RHOG,NFKBIA,AKT1,JUN,RHOB,NGFR,PPM1J,MAPK3,IRS2,PIK3R2,NOS2,PPP1CA,PPP1R14C,PIK3C2B,AKT2,TNFRSF1A,IFNGR2,PPP1R14A,IKBKE,IFNGR1,RHOJ,NFKB2,MAPK12,FOS,ALB,PLCG2,PIK3R6,PRKCH,SIRPA
Germ Cell-Sertoli Cell Junction Signaling	3.19	0.182	NaN	EPN3,MAP3K11,BCAR1,LIMK1,TGFBR2,AKT1,RHOG,MAP2K2,RHOB,TUBA8,TGFB1,KEAP1,MAPK3,IRS2,TUBB4A,PIK3R2,JUP,SRC,PIK3C2B,PXN,PAK6,TNFRSF1A,TUBG1,TUBA4A,RHOJ,GSN,MAPK12,EPN2,TUBA1A,ACTA2,PIK3R6,A2M
Relaxin Signaling	3.02	0.183	3.674	RELA,NFKBIE,ADCY4,GNA11,PDE4A,NOS3,NFKBIA,GNG11,AKT1,JUN,MAPK3,IRS2,PIK3R2,NOS2,SMPDL3A,PIK3C2B,AKT2,GUCY1A3,GNA12,NFKB2,GNAI2,ADCY9,FOS,NPR1,RXFP1,PDE1B,PRKACA,PIK3R6,GUCY1A2,NPR2
HIF1α Signaling	2.95	0.2	NaN	EGLN2,PIK3C2B,AKT2,MMP28,MAPK4,MMP14,MMP15,VEGFB,MMP2,NOS3,MAPK12,P4HTM,MMP23B,EGLN1,JUN,AKT1,SLC2A8,MAPK3,PIK3R6,HSP90AA1,IRS2,MMP11,PIK3R2,NOS2
Breast Cancer Regulation by Stathmin1	2.95	0.167	NaN	CAMK1,ADCY4,PPP2R5B,ARHGEF1,LIMK1,STMN1,SHC1,GNG11,MAP2K2,TUBA8,PPM1J,MAPK3,TUBB4A,IRS2,PIK3R2,PPP1CA,CAMK2B,PIK3C2B,PPP1R14C,ARHGEF15,TUBG1,TUBA4A,PPP1R14A,ARHGEF17,GNAI2,ADCY9,ARHGEF5,TUBA1A,CDKN1A,PRKACA,PIK3R6,PLCB3,PRKCH,ARHGEF18,CDKN1B
Erythropoietin Signaling	2.95	0.226	NaN	SRC,SOCS3,PIK3C2B,RELA,AKT2,NFKBIE,NFKB2,SHC1,FOS,JUN,AKT1,NFKBIA,MAP2K2,MAPK3,PLCG2,PIK3R6,PRKCH,IRS2,PIK3R2
PTEN Signaling	2.95	0.198	-3.128	FOXO4,RELA,AKT2,SHARPIN,IKBKE,MAGIX,INPPL1,GSK3A,NFKB2,CNKSR3,BCAR1,TGFBR2,SHC1,AKT1,MAP2K2,MAPK3,NGFR,FOXO3,CDKN1A,CDKN1B,PIK3R2,FGFRL1,MCRS1,PDGFRB
Ephrin Receptor Signaling	2.95	0.175	4.264	RGS3,GNA11,VEGFB,BCAR1,LIMK1,GRINA,SHC1,GNG11,AKT1,MAP2K2,SDC2,MAPK3,EFNB1,ATF4,ARPC3,SRC,AKT2,PXN,EPHB4,PAK6,ANGPT1,ARPC5L,CXCR4,GNA12,ARHGEF15,SH2D3C,PDGFB,EFNA1,GNAI2,EPHA2,MAP4K4
Inhibition of Angiogenesis by TSP1	2.95	0.308	2.449	TGFBR2,AKT2,SDC1,AKT1,JUN,GUCY1A3,SDC2,TGFB1,GUCY1A2,NOS3,MAPK12,Hspg2
PCP pathway	2.88	0.246	3.464	CELSR1,SDC1,WNT9A,DVL1,JUNB,SDC3,FZD1,MAPK12,FZD8,JUN,SDC2,EFNB1,SMO,DVL3,FZD2,FZD7
Role of Osteoblasts, Osteoclasts and Chondrocytes in Rheumatoid Arthritis	2.86	0.159	NaN	RELA,BMP4,SFRP2,MMP14,NFKBIE,FZD1,SMURF1,TRADD,NFKBIA,AKT1,JUN,TGFB1,NGFR,MAPK3,SMO,IRS2,PIK3R2,SMAD1,ALPL,FZD2,BMP1,SRC,PIK3C2B,AKT2,LRP5,TNFRSF1A,WNT9A,DVL1,IKBKE,NFATC4,GSN,TCF3,MAPK12,FZD8,FOS,PIK3R6,LRP1,FZD7
Gα12/13 Signaling	2.86	0.189	3.545	RELA,NFKBIE,TBXA2R,ARHGEF1,NFKBIA,AKT1,JUN,MAP2K2,MAPK3,IRS2,PIK3R2,CDH13,SRC,PIK3C2B,PXN,AKT2,GNA12,IKBKE,NFKB2,MAPK12,MYL1,CDH5,VAV3,MEF2D,PIK3R6
Regulation of the Epithelial-Mesenchymal Transition Pathway	2.86	0.169	NaN	RELA,PSEN2,FZD1,SMURF1,TGFBR2,AKT1,MAP2K2,TGFB1,MAPK3,SMO,IRS2,PIK3R2,FZD2,PDGFRB,ETS1,FGF16,PIK3C2B,AKT2,NOTCH3,JAG2,WNT9A,DVL1,MMP2,NFKB2,TCF3,FZD8,NOTCH4,PIK3R6,DVL3,FGFRL1,NOTCH1,FZD7
14-3-3-mediated Signaling	2.84	0.188	2.828	PIK3C2B,SRC,AKT2,TNFRSF1A,TUBG1,TUBA4A,GSK3A,MAPK12,FOS,JUN,AKT1,TUBA1A,MAP2K2,TUBA8,PLCG2,MAPK3,MAPT,PIK3R6,PLCB3,TUBB4A,IRS2,PRKCH,CDKN1B,PIK3R2,SNCA
IL-6 Signaling	2.69	0.188	4.082	RELA,SOCS3,PIK3C2B,AKT2,TNFRSF1A,NFKBIE,IKBKE,NFKB2,MAPK12,SHC1,FOS,JUN,AKT1,NFKBIA,MAP2K2,MAPK3,NGFR,PIK3R6,HSPB7,IRS2,PIK3R2,MAPKAPK2,A2M,MAP4K4
Mouse Embryonic Stem Cell Pluripotency	2.64	0.198	4.583	PIK3C2B,AKT2,BMP4,DVL1,FZD1,TCF3,MAPK12,ID3,FZD8,ID1,AKT1,MAP2K2,MAPK3,PIK3R6,SMO,DVL3,IRS2,PIK3R2,SMAD1,FZD2,FZD7
Acute Phase Response Signaling	2.56	0.169	2.294	SOCS3,RELA,SERPING1,NFKBIE,RBP1,C1R,SHC1,TRADD,HMOX1,NFKBIA,AKT1,JUN,MAP2K2,MAPK3,NGFR,PIK3R2,AGT,AKT2,TNFRSF1A,SERPINF1,IKBKE,NFKB2,TCF3,MAPK12,FOS,ALB,RBP7,FGA,A2M
ILK Signaling	2.56	0.162	3.78	RELA,PPP2R5B,VEGFB,GSK3A,RHOG,AKT1,JUN,RHOB,PPM1J,MAPK3,ATF4,IRS2,PIK3R2,TMSB10/TMSB4X,NOS2,ITGB5,PIK3C2B,PXN,AKT2,FBLIM1,LIMS2,TNFRSF1A,RHOJ,NFKB2,MAPK12,MYL1,FOS,ACTA2,PIK3R6,RPS6KA4,KRT18,ITGB6
Human Embryonic Stem Cell Pluripotency	2.56	0.176	NaN	PIK3C2B,AKT2,NTF3,S1PR2,BMP4,WNT9A,DVL1,GSK3A,FZD1,TCF3,NGF,PDGFB,TGFBR2,FZD8,AKT1,TGFB1,PIK3R6,SMO,IRS2,PIK3R2,FGFRL1,SMAD1,FZD2,BMP1,PDGFRB,FZD7
Type II Diabetes Mellitus Signaling	2.52	0.174	2.982	SOCS3,RELA,PRKAB1,NFKBIE,SMPD1,ADIPOR1,SLC27A4,KCNJ11,TRADD,NFKBIA,AKT1,MAPK3,NGFR,ABCC8,ACSL4,IRS2,PIK3R2,PIK3C2B,AKT2,TNFRSF1A,IKBKE,NFKB2,MAPK12,PIK3R6,PRKCH,SLC27A1
IL-8 Signaling	2.51	0.159	5.303	RELA,VEGFB,LIMK1,EIF4EBP1,HMOX1,RHOG,GNG11,AKT1,JUN,MAP2K2,RHOB,MAPK3,IRS2,PIK3R2,LASP1,ITGB5,SRC,PIK3C2B,AKT2,PLD3,ANGPT1,GNA12,IKBKE,MMP2,RHOJ,MAPK12,GNAI2,FOS,ARRB2,PIK3R6,PRKCH,MAP4K4
Gap Junction Signaling	2.51	0.163	NaN	DBN1,ADCY4,CSNK1E,AKT1,MAP2K2,TUBA8,MAPK3,TUBB4A,IRS2,PIK3R2,SRC,PIK3C2B,AKT2,GUCY1A3,CSNK1G2,TUBG1,TUBA4A,GNAI2,ADCY9,TUBA1A,NOV,ACTA2,NPR1,PLCG2,PRKACA,PIK3R6,GUCY1A2,PLCB3,PRKCH,NPR2
NGF Signaling	2.51	0.183	4.264	PIK3C2B,RELA,AKT2,MAP3K11,IKBKE,SMPD1,NFKB2,NGF,MAPK12,SHC1,RPS6KA6,RHOG,AKT1,MAP2K2,MAPK3,NGFR,PLCG2,TRAF4,PIK3R6,ATF4,RPS6KA4,IRS2,PIK3R2
Angiopoietin Signaling	2.51	0.212	0.577	PIK3C2B,RELA,AKT2,GRB14,ANGPT1,PAK6,NFKBIE,IKBKE,NFKB2,NOS3,TIE1,TNIP1,AKT1,NFKBIA,PIK3R6,IRS2,PIK3R2
NRF2-mediated Oxidative Stress Response	2.51	0.161	2.84	AKR7A2,HSPB8,DNAJB2,SOD3,HMOX1,AKT1,JUN,SCARB1,MAP2K2,DNAJC4,KEAP1,MAPK3,ATF4,IRS2,PIK3R2,PIK3C2B,DNAJB12,HERPUD1,JUNB,DNAJB9,MAFK,GSTO1,FOS,ACTA2,DNAJB11,PIK3R6,PRKCH,SQSTM1,MGST3,FTH1,EPHX1
PI3K Signaling in B Lymphocytes	2.49	0.178	4.69	RELA,IL4R,AKT2,NFKBIE,IKBKE,NFATC4,NFKB2,FOS,JUN,AKT1,NFKBIA,MAP2K2,BCL10,CARD10,VAV3,MAPK3,PLCG2,FOXO3,ATF6B,PLCB3,ATF4,IRS2,PIK3R2,CAMK2B
Chronic Myeloid Leukemia Signaling	2.46	0.192	NaN	PIK3C2B,RELA,AKT2,HDAC4,HDAC10,IKBKE,NFKB2,HDAC5,CTBP1,TGFBR2,AKT1,MAP2K2,TGFB1,MAPK3,HDAC11,CDKN1A,PIK3R6,IRS2,CDKN1B,PIK3R2
B Cell Receptor Signaling	2.46	0.159	4.017	RAP2B,RELA,MAP3K11,NFKBIE,GSK3A,INPPL1,BCL6,SHC1,NFKBIA,AKT1,JUN,MAP2K2,CARD10,MAPK3,ATF4,IRS2,PIK3R2,CAMK2B,ETS1,PIK3C2B,AKT2,CSK,IKBKE,NFATC4,NFKB2,TCF3,MAPK12,BCL10,VAV3,PLCG2,PIK3R6
Ceramide Signaling	2.44	0.196	1.213	PIK3C2B,RELA,AKT2,S1PR2,CNKSR1,TNFRSF1A,PPP2R5B,SMPD1,CERK,NFKB2,FOS,JUN,AKT1,MAPK3,NGFR,PPM1J,PIK3R6,IRS2,PIK3R2
Regulation of IL-2 Expression in Activated and Anergic T Lymphocytes	2.44	0.207	NaN	RELA,NFKBIE,TOB1,IKBKE,NFATC4,NFKB2,MAPK12,TGFBR2,FOS,JUN,NFKBIA,MAP2K2,BCL10,TGFB1,VAV3,MAPK3,PLCG2
JAK/Stat Signaling	2.38	0.205	2.183	SOCS3,PIK3C2B,RELA,AKT2,NFKB2,SHC1,PIAS3,FOS,JUN,AKT1,PIAS4,MAP2K2,MAPK3,CDKN1A,PIK3R6,IRS2,PIK3R2
CXCR4 Signaling	2.35	0.162	3.8	ADCY4,GNA11,BCAR1,GNG11,AKT1,JUN,RHOG,MAP2K2,RHOB,MAPK3,IRS2,PIK3R2,SRC,PIK3C2B,PXN,AKT2,PAK6,CXCR4,GNA12,RHOJ,MAPK12,MYL1,GNAI2,ADCY9,FOS,PIK3R6,PLCB3,PRKCH
Role of NFAT in Cardiac Hypertrophy	2.32	0.155	2.646	CAMK1,ADCY4,HDAC10,CABIN1,TGFBR2,SHC1,GNG11,AKT1,MAP2K2,TGFB1,HDAC11,MAPK3,IRS2,PIK3R2,CAMK2B,SRC,PIK3C2B,AKT2,HDAC4,NFATC4,MAPK12,HDAC5,GNAI2,CTF1,ADCY9,MEF2D,PLCG2,PRKACA,PIK3R6,PLCB3,PRKCH
IGF-1 Signaling	2.31	0.185	3.207	IGFBP6,IGFBP4,SOCS3,PIK3C2B,PXN,AKT2,IGFBP7,IGFBP2,SHC1,FOS,JUN,AKT1,NOV,MAP2K2,MAPK3,FOXO3,PRKACA,PIK3R6,IRS2,PIK3R2
Thrombin Signaling	2.3	0.152	4.382	RELA,CAMK1,ADCY4,GNA11,ARHGEF1,GATA2,SHC1,RHOG,GNG11,AKT1,MAP2K2,RHOB,MAPK3,IRS2,PIK3R2,CAMK2B,SRC,PIK3C2B,AKT2,GNA12,ARHGEF15,RHOJ,NFKB2,MAPK12,MYL1,GNAI2,ADCY9,ARHGEF5,PLCG2,PIK3R6,PLCB3,PRKCH
Clathrin-mediated Endocytosis Signaling	2.28	0.153	NaN	APOE,RAB5C,STON2,CLTB,VEGFB,Ubb,RAB5B,LYZ,ARRB1,RAB11B,ARPC3,IRS2,PIK3R2,LDLRAP1,HGS,DNM2,ITGB5,FGF16,SRC,PIK3C2B,ARPC5L,CLTC,AP2S1,PDGFB,ARRB2,ALB,ACTA2,PIP5K1C,PIK3R6,ITGB6,UBC
Integrin Signaling	2.28	0.15	5.112	RAP2B,MAP3K11,TSPAN7,BCAR1,SHC1,RHOG,AKT1,MAP2K2,RHOB,MAPK3,ARPC3,IRS2,PIK3R2,ITGB5,SRC,PIK3C2B,PXN,AKT2,PAK6,ARPC5L,RALB,RHOJ,BCAR3,GSN,GIT1,PDGFB,CAPNS1,ACTA2,PLCG2,CAPN1,PIK3R6,ITGB6,ITGA7
Phospholipase C Signaling	2.26	0.145	5.112	PEBP1,RELA,ADCY4,HDAC10,ARHGEF1,SHC1,HMOX1,RHOG,GNG11,MAP2K2,RHOB,HDAC11,MAPK3,PLA2G5,ATF4,RALGDS,SRC,PLD3,HDAC4,ARHGEF15,RALB,PPP1R14A,ARHGEF17,RAPGEF3,RHOJ,NFKB2,NFATC4,MYL1,HDAC5,ADCY9,ARHGEF5,PLCG2,MEF2D,PLCB3,PRKCH,ARHGEF18
Sertoli Cell-Sertoli Cell Junction Signaling	2.24	0.156	NaN	EPN3,MAP3K11,GSK3A,NOS3,BCAR1,AKT1,JUN,MAP2K2,TUBA8,KEAP1,MAPK3,TUBB4A,JUP,NOS2,SRC,AKT2,GUCY1A3,TNFRSF1A,TUBG1,TUBA4A,MAPK12,EPN2,F11R,TUBA1A,CLDN5,ACTA2,PRKACA,GUCY1A2,A2M
Gαq Signaling	2.24	0.16	5	RELA,NFKBIE,GNA11,HMOX1,NFKBIA,GNG11,AKT1,RHOG,MAP2K2,RHOB,MAPK3,IRS2,ARHGEF25,PIK3R2,ADRA1B,PIK3C2B,AKT2,PLD3,CSK,IKBKE,RHOJ,NFATC4,NFKB2,PLCG2,PIK3R6,PLCB3,PRKCH
PPAR Signaling	2.24	0.189	-2.828	RELA,TNFRSF1A,NFKBIE,IKBKE,NFKB2,PDGFB,SHC1,FOS,JUN,NFKBIA,MAP2K2,MAPK3,NGFR,HSP90AA1,RXRA,MAP4K4,CITED2,PDGFRB
Telomerase Signaling	2.24	0.18	2.138	ETS1,PIK3C2B,AKT2,HDAC4,TERF2IP,PPP2R5B,HDAC10,HDAC5,SHC1,AKT1,MAP2K2,ETS2,MAPK3,HDAC11,PPM1J,CDKN1A,PIK3R6,HSP90AA1,IRS2,PIK3R2
RANK Signaling in Osteoclasts	2.24	0.184	4.123	SRC,PIK3C2B,RELA,AKT2,MAP3K11,NFKBIE,IKBKE,NFKB2,GSN,MAPK12,FOS,JUN,AKT1,NFKBIA,MAP2K2,MAPK3,PIK3R6,IRS2,PIK3R2
Endothelin-1 Signaling	2.24	0.151	3.772	ADCY4,GNA11,NOS3,PLBD1,SHC1,HMOX1,JUN,MAPK3,PLA2G5,CASQ1,IRS2,PIK3R2,NOS2,SHF,PLA2G16,SRC,PIK3C2B,PLD3,GUCY1A3,MAPK4,GNA12,MAPK12,GNAI2,ADCY9,FOS,PLCG2,SHC2,PIK3R6,GUCY1A2,PLCB3,PRKCH
Pancreatic Adenocarcinoma Signaling	2.2	0.175	4	PIK3C2B,RELA,AKT2,PLD3,VEGFB,NFKB2,MAPK12,TGFBR2,HMOX1,AKT1,MAP2K2,TGFB1,MAPK3,CDKN1A,PIK3R6,BRCA2,IRS2,CDKN1B,PIK3R2,NOTCH1,RALGDS
Role of Macrophages, Fibroblasts and Endothelial Cells in Rheumatoid Arthritis	2.2	0.136	NaN	RELA,SOCS3,SFRP2,NFKBIE,VEGFB,FZD1,TRADD,AKT1,JUN,NFKBIA,MAP2K2,TGFB1,NGFR,MAPK3,TRAF4,SMO,ATF4,IRS2,PIK3R2,LTBR,NOS2,MAPKAPK2,FZD2,CAMK2B,PIK3C2B,SRC,AKT2,LRP5,TNFRSF1A,WNT9A,DVL1,IKBKE,NFATC4,TCF3,PDGFB,FZD8,FOS,PLCG2,PIK3R6,PLCB3,PRKCH,LRP1,FZD7
Sphingosine-1-phosphate Signaling	2.19	0.171	3.71	PIK3C2B,AKT2,S1PR2,ADCY4,GNA12,SMPD1,RHOJ,PDGFB,GNAI2,ADCY9,NAAA,RHOG,AKT1,RHOB,MAPK3,PLCG2,CASQ1,PIK3R6,PLCB3,IRS2,PIK3R2,PDGFRB
NF-κB Signaling	2.18	0.155	4.158	SIGIRR,RELA,BMP4,NFKBIE,NGF,TGFBR2,TRADD,TNIP1,NFKBIA,AKT1,CARD10,NGFR,IRS2,PIK3R2,LTBR,PDGFRB,PIK3C2B,AKT2,TNFRSF1A,RELB,NFKB2,FADD,BCL10,PLCG2,PRKACA,PIK3R6,FGFRL1,MAP4K4
4-1BB Signaling in T Lymphocytes	2.18	0.281	2.646	RELA,NFKBIA,JUN,MAP2K2,MAPK3,NFKBIE,IKBKE,NFKB2,MAPK12
Osteoarthritis Pathway	2.18	0.147	2.414	RELA,RARRES2,PRKAB1,VEGFB,ACVRL1,HES1,FZD1,TGFBR2,TGFB1,FOXO3,CASQ1,SMO,ATF4,NOS2,SMAD1,FZD2,ALPL,EPAS1,S1PR2,HDAC4,DDIT4,TNFRSF1A,DCN,NFKB2,TCF3,FADD,FZD8,GLIS2,ANKH,NOTCH1,LRP1,FZD7
PI3K/AKT Signaling	2.17	0.169	0.894	RELA,AKT2,NFKBIE,PPP2R5B,IKBKE,INPPL1,GSK3A,NFKB2,NOS3,MAPK8IP1,EIF4EBP1,SHC1,AKT1,NFKBIA,MAP2K2,MAPK3,PPM1J,FOXO3,CDKN1A,HSP90AA1,CDKN1B,PIK3R2
Glioblastoma Multiforme Signaling	2.14	0.158	3.922	FZD1,SHC1,AKT1,RHOG,RHOB,MAP2K2,MAPK3,SMO,IRS2,PIK3R2,FZD2,PDGFRB,SRC,PIK3C2B,AKT2,WNT9A,RHOJ,TCF3,PDGFB,FZD8,PLCG2,CDKN1A,PIK3R6,PLCB3,CDKN1B,FZD7
Renin-Angiotensin Signaling	2.14	0.168	4.69	PIK3C2B,RELA,PAK6,ADCY4,NFKB2,MAPK12,ADCY9,SHC1,FOS,JUN,MAP2K2,MAPK3,PLCG2,SHC2,PRKACA,PIK3R6,PRKCH,IRS2,PIK3R2,SHF,ACE,AGT
Wnt/Ca+ pathway	2.07	0.213	3.606	FZD8,RELA,PLCG2,DVL1,SMO,PLCB3,ATF4,DVL3,FZD1,NFKB2,NFATC4,FZD2,FZD7
ERK/MAPK Signaling	2.07	0.148	2.921	PPP2R5B,BCAR1,EIF4EBP1,SHC1,MAP2K2,ETS2,MAPK3,PPM1J,PLA2G5,ATF4,IRS2,PIK3R2,PPP1CA,ETS1,MYCN,SRC,PIK3C2B,PPP1R14C,PXN,PAK6,PPP1R14A,RAPGEF3,MKNK2,FOS,DUSP1,PLCG2,PRKACA,PIK3R6,HSPB7,RPS6KA4
HMGB1 Signaling	2.07	0.165	4.69	PIK3C2B,RELA,AKT2,TNFRSF1A,IFNGR2,IFNGR1,RHOJ,NFKB2,MAPK12,FOS,RHOG,JUN,AKT1,MAP2K2,RHOB,Il17d,TGFB1,MAPK3,NGFR,PIK3R6,IRS2,PIK3R2
Lymphotoxin β Receptor Signaling	2.05	0.203	2.714	PIK3C2B,RELA,AKT2,RELB,IKBKE,NFKB2,AKT1,NFKBIA,MAPK3,TRAF4,PIK3R6,IRS2,LTBR,PIK3R2
Remodeling of Epithelial Adherens Junctions	2.05	0.203	2.646	SRC,RAB5C,ARPC5L,TUBG1,TUBA4A,RAB5B,TUBA1A,TUBA8,ACTA2,ARPC3,TUBB4A,HGS,DNM2,MAPRE3
Renal Cell Carcinoma Signaling	2.03	0.188	3.464	ETS1,PIK3C2B,AKT2,PAK6,Ubb,PDGFB,FOS,JUN,AKT1,MAP2K2,TGFB1,MAPK3,PIK3R6,IRS2,PIK3R2,UBC
RhoA Signaling	2.03	0.167	3.153	PLXNA1,SEPT8,SEPT9,NRP2,ARPC5L,RTKN,GNA12,CDC42EP3,ARHGEF1,CDC42EP4,CDC42EP2,MYL1,LIMK1,RHPN2,ACTA2,PIP5K1C,PLEKHG5,ARPC3,CDC42EP1,SEMA3F,PIP4K2C
iNOS Signaling	2.01	0.229	3.317	RELA,FOS,NFKBIA,JUN,NFKBIE,IFNGR2,IKBKE,IFNGR1,NFKB2,MAPK12,NOS2
FAK Signaling	2	0.176	NaN	SRC,PIK3C2B,PXN,AKT2,PAK6,CSK,BCAR1,CAPNS1,AKT1,MAP2K2,ACTA2,MAPK3,CAPN1,PLCG2,PIK3R6,IRS2,PIK3R2,TNS1
IL-17A Signaling in Fibroblasts	1.97	0.257	NaN	RELA,FOS,NFKBIA,JUN,MAPK3,NFKBIE,IKBKE,NFKB2,MAPK12
LXR/RXR Activation	1.97	0.164	-0.5	APOE,SCD,RELA,MLXIPL,TNFRSF1A,VTN,SERPINF1,NFKB2,ABCA1,RXRG,ALB,LYZ,NR1H2,NGFR,MYLIP,RXRA,NOS2,HMGCR,FGA,CYP51A1,AGT
CD40 Signaling	1.96	0.19	2.84	PIK3C2B,RELA,NFKBIE,IKBKE,NFKB2,MAPK12,FOS,JUN,NFKBIA,MAP2K2,MAPK3,PIK3R6,IRS2,PIK3R2,MAPKAPK2
PEDF Signaling	1.96	0.184	3.742	PIK3C2B,RELA,AKT2,NFKBIE,SERPINF1,IKBKE,NFKB2,NGF,MAPK12,PNPLA2,AKT1,NFKBIA,MAPK3,PIK3R6,IRS2,PIK3R2
Phagosome Maturation	1.94	0.155	NaN	ATP6V0E2,CALR,VPS18,ATP6V0B,RAB5C,PRDX5,HLA-A,TUBG1,TUBA4A,RAB5B,VPS37C,PRDX6,CTSF,CTSZ,DYNC1LI1,CTSA,TUBA1A,ATP6V1F,TUBA8,VPS37B,CTSB,LAMP1,TUBB4A,ACE
Corticotropin Releasing Hormone Signaling	1.92	0.165	4.359	GUCY1A3,ADCY4,NOS3,MAPK12,GNAI2,ADCY9,FOS,JUN,MAP2K2,MAPK3,MEF2D,NPR1,PLCG2,PRKACA,GUCY1A2,SMO,ATF4,PRKCH,NOS2,NPR2
Small Cell Lung Cancer Signaling	1.92	0.182	NaN	PIK3C2B,RELA,AKT2,NFKBIE,IKBKE,NFKB2,PIAS3,RXRG,AKT1,NFKBIA,TRAF4,PIK3R6,IRS2,CDKN1B,PIK3R2,RXRA
Role of NFAT in Regulation of the Immune Response	1.92	0.146	3.962	RELA,HLA-A,NFKBIE,GNA11,GSK3A,CABIN1,CSNK1E,NFKBIA,GNG11,AKT1,JUN,MAP2K2,MAPK3,IRS2,PIK3R2,PIK3C2B,AKT2,CSNK1G2,GNA12,IKBKE,NFATC4,NFKB2,GNAI2,FOS,MEF2D,PLCG2,PIK3R6,PLCB3
TNFR1 Signaling	1.91	0.22	3.317	FADD,RELA,TRADD,FOS,NFKBIA,JUN,PAK6,TNFRSF1A,NFKBIE,IKBKE,NFKB2
Caveolar-mediated Endocytosis Signaling	1.89	0.192	NaN	SRC,RAB5C,HLA-A,FLOT1,RAB5B,ALB,CD55,FLOT2,ACTA2,ITGB6,CAVIN1,ITGA7,ITGB5,DNM2
PPARα/RXRα Activation	1.86	0.146	-1.225	RELA,GPD1,PRKAB1,NFKBIE,ADCY4,GNA11,ADIPOR1,ABCA1,TGFBR2,SHC1,NFKBIA,JUN,MAP2K2,TGFB1,MAPK3,ITGB5,IKBKE,NFKB2,ADCY9,HELZ2,PLCG2,PRKACA,HSP90AA1,PLCB3,SLC27A1,RXRA,MAP4K4
autophagy	1.86	0.197	NaN	CTSZ,CTSA,ULK1,VPS18,ATG9A,ATG4D,WIPI1,CTSB,LAMP1,MAP1LC3A,SQSTM1,ACE,CTSF
Hepatic Fibrosis / Hepatic Stellate Cell Activation	1.8	0.144	NaN	RELA,IGFBP4,IL4R,COL4A6,COL6A2,TNFRSF1A,IFNGR2,VEGFB,MMP2,IFNGR1,NFKB2,PDGFB,MYL1,TGFBR2,COL5A1,COL5A3,COL6A1,ACTA2,TGFB1,NGFR,CCL21,COL11A2,A2M,AGT,TIMP2,COL3A1,PDGFRB
Amyloid Processing	1.79	0.212	2	CSNK1E,AKT2,CAPNS1,AKT1,MAPK3,MAPT,CAPN1,PRKACA,PSEN2,BACE2,MAPK12
Prostate Cancer Signaling	1.78	0.17	NaN	PIK3C2B,RELA,AKT2,NFKBIE,NFKB2,AKT1,NFKBIA,AR,MAP2K2,MAPK3,CDKN1A,PIK3R6,HSP90AA1,ATF4,IRS2,CDKN1B,PIK3R2
Death Receptor Signaling	1.72	0.172	2	TNFRSF21,RELA,TNFRSF1A,NFKBIE,ART1,TNFSF10,LMNA,IKBKE,NFKB2,LIMK1,FADD,TRADD,NFKBIA,ACTA2,HSPB7,MAP4K4
Induction of Apoptosis by HIV1	1.72	0.197	2.309	FADD,RELA,TRADD,NFKBIA,BBC3,TNFRSF1A,CXCR4,NFKBIE,NGFR,IKBKE,NFKB2,MAPK12
MIF Regulation of Innate Immunity	1.72	0.217	3.162	RELA,FOS,NFKBIA,JUN,MAPK3,NFKBIE,PLA2G5,NFKB2,MAPK12,NOS2
April Mediated Signaling	1.71	0.231	1.667	RELA,FOS,NFKBIA,JUN,NFKBIE,IKBKE,NFATC4,NFKB2,MAPK12
CD28 Signaling in T Helper Cells	1.7	0.153	3.771	RELA,PIK3C2B,AKT2,HLA-A,ARPC5L,CSK,NFKBIE,IKBKE,NFKB2,NFATC4,MAPK12,FOS,JUN,AKT1,NFKBIA,MAP2K2,BCL10,PIK3R6,ARPC3,IRS2,PIK3R2
Aryl Hydrocarbon Receptor Signaling	1.7	0.151	1.604	SRC,RELA,NFIX,NFIC,NFKB2,RARG,GSTO1,RXRG,FOS,JUN,ALDH1L2,TGFB1,MAPK3,NEDD8,CDKN1A,ALDH1A2,HSP90AA1,HSPB7,CDKN1B,RXRA,ALDH16A1,MGST3
Ovarian Cancer Signaling	1.7	0.151	NaN	SRC,PIK3C2B,AKT2,WNT9A,DVL1,VEGFB,MMP2,FZD1,TCF3,FZD8,ARRB1,AKT1,MAP2K2,MAPK3,PRKACA,PIK3R6,SMO,BRCA2,IRS2,PIK3R2,FZD2,FZD7
VEGF Family Ligand-Receptor Interactions	1.7	0.17	3.873	PIK3C2B,AKT2,NRP2,VEGFB,NOS3,SHC1,FOS,AKT1,MAP2K2,MAPK3,PLCG2,PLA2G5,PIK3R6,PRKCH,IRS2,PIK3R2
CDK5 Signaling	1.68	0.165	1.213	PPP1R14C,MAPK4,ADCY4,CABLES1,PPP2R5B,PPP1R14A,NGF,MAPK12,ADCY9,MAP2K2,MAPK3,MAPT,CAPN1,PPM1J,NGFR,PRKACA,PPP1CA
LPS-stimulated MAPK Signaling	1.65	0.172	3.873	PIK3C2B,RELA,NFKBIE,IKBKE,NFKB2,MAPK12,FOS,JUN,NFKBIA,MAP2K2,MAPK3,PIK3R6,PRKCH,IRS2,PIK3R2
TGF-β Signaling	1.65	0.172	1.732	BMP4,SKI,MAPK12,TGIF1,SMURF1,TGFBR2,FOS,JUN,PIAS4,MAP2K2,TGFB1,MAPK3,TFE3,SMAD1,PMEPA1
Epithelial Adherens Junction Signaling	1.65	0.149	NaN	EPN3,SRC,AKT2,NOTCH3,ARPC5L,TUBG1,TUBA4A,TCF3,PTPRM,MYL1,TGFBR2,EPN2,NOTCH4,TUBA1A,AKT1,ACTA2,TUBA8,KEAP1,ARPC3,TUBB4A,JUP,NOTCH1
Antiproliferative Role of Somatostatin Receptor 2	1.65	0.177	1.897	SRC,PIK3C2B,GUCY1A3,GNG11,MAP2K2,MAPK3,NPR1,CDKN1A,PIK3R6,GUCY1A2,IRS2,PIK3R2,CDKN1B,NPR2
GDNF Family Ligand-Receptor Interactions	1.65	0.177	3.742	PIK3C2B,MAPK12,SHC1,FOS,JUN,NRTN,DOK4,MAP2K2,MAPK3,PLCG2,PIK3R6,DOK7,IRS2,PIK3R2
Role of IL-17A in Arthritis	1.65	0.183	NaN	PIK3C2B,RELA,NFKBIE,NFKB2,MAPK12,NFKBIA,MAP2K2,MAPK3,PIK3R6,IRS2,PIK3R2,MAPKAPK2,NOS2
Role of NANOG in Mammalian Embryonic Stem Cell Pluripotency	1.64	0.156	3	PIK3C2B,AKT2,BMP4,WNT9A,DVL1,FZD1,SHC1,FZD8,AKT1,MAP2K2,MAPK3,PIK3R6,SMO,IRS2,PIK3R2,SMAD1,FZD2,BMP1,FZD7
IL-17A Signaling in Airway Cells	1.62	0.175	2.673	PIK3C2B,RELA,AKT2,NFKBIE,IKBKE,NFKB2,MAPK12,AKT1,NFKBIA,MAP2K2,MAPK3,PIK3R6,IRS2,PIK3R2
Antioxidant Action of Vitamin C	1.62	0.158	-3.873	PLA2G16,RELA,PLD3,NFKBIE,IKBKE,NFKB2,MAPK12,GSTO1,PLBD1,HMOX1,SLC2A8,NFKBIA,CSF2RA,MAPK3,PLCG2,PLA2G5,PLCB3,NXN
B Cell Activating Factor Signaling	1.62	0.22	2.449	RELA,FOS,NFKBIA,JUN,NFKBIE,IKBKE,NFATC4,NFKB2,MAPK12
IL-12 Signaling and Production in Macrophages	1.61	0.147	NaN	APOE,PIK3C2B,RELA,AKT2,IKBKE,IFNGR1,NFKB2,MAPK12,FOS,ALB,LYZ,JUN,AKT1,MAP2K2,TGFB1,MAPK3,PIK3R6,PRKCH,IRS2,PIK3R2,RXRA,NOS2
Estrogen-Dependent Breast Cancer Signaling	1.59	0.173	3.606	SRC,PIK3C2B,RELA,AKT2,HSD17B7,NFKB2,FOS,JUN,AKT1,MAPK3,PIK3R6,ATF4,IRS2,PIK3R2
Neurotrophin/TRK Signaling	1.59	0.173	3.742	PIK3C2B,NTF3,NGF,SHC1,FOS,JUN,AKT1,MAP2K2,MAPK3,NGFR,PIK3R6,ATF4,IRS2,PIK3R2
RhoGDI Signaling	1.58	0.14	-2.837	PPP1R12C,GNA11,ARHGEF1,LIMK1,GNG11,RHOG,RHOB,ARPC3,CDH13,SRC,PAK6,ARPC5L,GNA12,ARHGEF15,ARHGEF17,RHOJ,MYL1,GNAI2,ARHGEF5,ACTA2,CDH5,PIP5K1C,ARHGDIA,ARHGEF18,PIP4K2C
IL-10 Signaling	1.58	0.178	NaN	FOS,RELA,HMOX1,SOCS3,IL4R,NFKBIA,JUN,NFKBIE,BLVRB,IKBKE,NFKB2,MAPK12,MAP4K4
Leptin Signaling in Obesity	1.57	0.167	1.897	NPY,SOCS3,PIK3C2B,AKT2,ADCY4,ADCY9,AKT1,MAP2K2,MAPK3,PLCG2,PIK3R6,PRKACA,PLCB3,IRS2,PIK3R2
P2Y Purigenic Receptor Signaling Pathway	1.57	0.147	4.146	PIK3C2B,RELA,AKT2,ADCY4,NFKB2,GNAI2,ADCY9,FOS,JUN,AKT1,GNG11,MAP2K2,MAPK3,PLCG2,PRKACA,PIK3R6,PLCB3,ATF4,PRKCH,IRS2,PIK3R2
GM-CSF Signaling	1.54	0.176	2.887	ETS1,SHC1,PIK3C2B,AKT2,AKT1,MAP2K2,PIM1,CSF2RA,MAPK3,PIK3R6,IRS2,PIK3R2,CAMK2B
GNRH Signaling	1.54	0.148	3.578	SRC,RELA,MAP3K11,PAK6,ADCY4,GNA11,NFKB2,MAPK12,GNAI2,ADCY9,FOS,JUN,MAP2K2,MAPK3,PRKACA,PLCB3,ATF4,PRKCH,DNM2,CAMK2B
AMPK Signaling	1.52	0.132	2.449	FOXO4,ULK1,PRKAB1,PPP2R5B,SMARCD2,NOS3,EIF4EBP1,AKT1,PCK2,PPM1J,FOXO3,ATF4,IRS2,SMARCC2,PIK3R2,CPT1C,ADRA1B,SRC,PIK3C2B,AKT2,ACACB,EEF2,SMARCD1,MAPK12,CDKN1A,PRKACA,PIK3R6,MLYCD,HMGCR
VEGF Signaling	1.52	0.156	3.357	SRC,PIK3C2B,PXN,AKT2,VEGFB,NOS3,SHC1,AKT1,ACTA2,MAP2K2,MAPK3,PLCG2,FOXO3,PIK3R6,IRS2,PIK3R2,EIF1AX
HGF Signaling	1.52	0.153	3.5	ETS1,PIK3C2B,PXN,AKT2,MAP3K11,MAPK12,FOS,JUN,AKT1,MAP2K2,ETS2,MAPK3,PLCG2,CDKN1A,PIK3R6,PRKCH,IRS2,PIK3R2
STAT3 Pathway	1.52	0.173	1.941	SRC,SOCS3,MAP3K11,MAPK12,TGFBR2,PIAS3,MAP2K2,PIM1,MAPK3,NGFR,CDKN1A,FGFRL1,PDGFRB
Chemokine Signaling	1.52	0.173	3.606	SRC,CAMK1,CXCR4,MAPK12,LIMK1,GNAI2,FOS,JUN,MAP2K2,MAPK3,PLCG2,PLCB3,CAMK2B
Tec Kinase Signaling	1.52	0.139	3.9	TNFRSF21,RELA,SRC,PIK3C2B,PAK6,GNA12,GNA11,TNFSF10,RHOJ,NFKB2,MAPK12,GNAI2,FADD,FOS,RHOG,GNG11,RHOB,ACTA2,VAV3,PLCG2,PIK3R6,PRKCH,IRS2,PIK3R2
Factors Promoting Cardiogenesis in Vertebrates	1.52	0.163	NaN	TGFBR2,FZD8,LRP5,BMP4,TGFB1,DVL1,SMO,PRKCH,FZD1,TCF3,SMAD1,FZD2,LRP1,BMP1,FZD7
Insulin Receptor Signaling	1.47	0.143	1.147	PPP1R14C,SOCS3,PIK3C2B,FOXO4,AKT2,TRIP10,PPP1R14A,INPPL1,GSK3A,PTPRF,EIF4EBP1,SHC1,AKT1,MAP2K2,MAPK3,FOXO3,PRKACA,PIK3R6,IRS2,PIK3R2,PPP1CA
Sumoylation Pathway	1.47	0.157	-0.535	ETS1,RHOJ,NFKB2,MAPK12,CTBP1,FOS,PIAS4,JUN,NFKBIA,RHOG,AR,RHOB,RANGAP1,ARHGDIA,CBX4,SNCA
p70S6K Signaling	1.47	0.145	3.578	SRC,PIK3C2B,IL4R,AKT2,EEF2,PPP2R5B,GNAI2,SHC1,AKT1,MAP2K2,MAPK3,MAPT,PLCG2,PPM1J,PIK3R6,PLCB3,PRKCH,IRS2,PIK3R2,AGT
FLT3 Signaling in Hematopoietic Progenitor Cells	1.46	0.165	2.673	PIK3C2B,AKT2,MAPK12,EIF4EBP1,SHC1,RPS6KA6,AKT1,MAP2K2,MAPK3,PIK3R6,ATF4,RPS6KA4,IRS2,PIK3R2
TNFR2 Signaling	1.44	0.233	2.646	RELA,FOS,NFKBIA,JUN,NFKBIE,IKBKE,NFKB2
Glucocorticoid Receptor Signaling	1.43	0.122	NaN	RELA,PRKAB1,NFKBIE,SMARCD2,TGFBR2,SHC1,AR,NFKBIA,AKT1,JUN,MAP2K2,PCK2,TGFB1,MAPK3,FOXO3,IRS2,SMARCC2,PIK3R2,NOS2,AGT,PIK3C2B,AKT2,IKBKE,SMARCD1,NFATC4,MAPK12,HSPA2,FOS,GTF2H4,DUSP1,CDKN1A,PRKACA,FKBP4,PIK3R6,HSP90AA1,A2M
CD27 Signaling in Lymphocytes	1.42	0.189	2.646	RELA,FOS,NFKBIA,MAP3K11,JUN,MAP2K2,NFKBIE,IKBKE,NFKB2,MAPK12
IL-1 Signaling	1.42	0.158	3.742	RELA,ADCY4,GNA12,NFKBIE,GNA11,IKBKE,NFKB2,MAPK12,GNAI2,ADCY9,FOS,JUN,GNG11,NFKBIA,PRKACA
Leukocyte Extravasation Signaling	1.39	0.129	3.657	MMP14,MMP15,BCAR1,MAP2K2,SIPA1,IRS2,MMP11,PIK3R2,TIMP2,SRC,PIK3C2B,PXN,MMP28,CXCR4,THY1,RAPGEF3,MMP2,MAPK12,GNAI2,F11R,MMP23B,CLDN5,ACTA2,CDH5,VAV3,PLCG2,PIK3R6,PRKCH
Acute Myeloid Leukemia Signaling	1.39	0.156	3.051	RELA,PIK3C2B,AKT2,AKT1,MAP2K2,PIM1,CSF2RA,MAPK3,PIK3R6,IRS2,PIK3R2,NFKB2,JUP,TCF3,EIF4EBP1
SAPK/JNK Signaling	1.38	0.152	3.357	PIK3C2B,DUSP8,MAP3K11,GNA12,MAPK12,MAPK8IP1,FADD,MINK1,SHC1,TRADD,JUN,GNG11,PIK3R6,IRS2,PIK3R2,MAP4K4
Superpathway of Inositol Phosphate Compounds	1.38	0.125	NaN	SOCS3,PPP1R12C,DUSP8,NUDT9,NUDT3,PPFIBP2,PPP2R5B,INPPL1,PTPRF,DUSP5,IP6K3,ITPKB,IRS2,PIK3R2,PALD1,PPP1CA,ALPL,PDGFRB,DUSP28,PIK3C2B,PPP1R14A,PTPRM,PI4K2A,DUSP1,PIP5K1C,CDIPT,PLCG2,SSH3,PIK3R6,PLCB3,SIRPA,PIP4K2C
VDR/RXR Activation	1.38	0.165	NaN	IGFBP6,LRP5,HES1,HR,THBD,KLF4,RXRG,MXD1,CDKN1A,PRKCH,SEMA3B,CDKN1B,RXRA
NF-κB Activation by Viruses	1.37	0.159	3.742	PIK3C2B,RELA,AKT2,NFKBIE,IKBKE,NFKB2,AKT1,NFKBIA,MAPK3,PIK3R6,IRS2,PRKCH,PIK3R2,ITGB5
Glioma Invasiveness Signaling	1.36	0.169	2.887	PIK3C2B,RHOG,RHOB,MAPK3,VTN,PIK3R6,RHOJ,MMP2,IRS2,PIK3R2,ITGB5,TIMP2
Cholecystokinin/Gastrin-mediated Signaling	1.36	0.151	4	SRC,PXN,GNA12,RHOJ,MAPK12,BCAR1,SHC1,FOS,JUN,RHOG,RHOB,MAP2K2,MAPK3,MEF2D,PLCB3,PRKCH
Xenobiotic Metabolism Signaling	1.34	0.121	NaN	RELA,CAMK1,MAP3K11,CHST7,PPP2R5B,SOD3,CHST2,HS6ST1,HMOX1,MAP2K2,KEAP1,PPM1J,MAPK3,HS3ST1,IRS2,PIK3R2,NOS2,CITED2,CAMK2B,PIK3C2B,HDAC4,MGMT,NFKB2,MAPK12,GSTO1,HDAC5,CHST1,ALDH1L2,ALDH1A2,PIK3R6,HSP90AA1,PRKCH,ALDH16A1,RXRA,MGST3
Role of Tissue Factor in Cancer	1.34	0.144	NaN	SRC,PIK3C2B,AKT2,GNA12,GNA11,MAPK12,LIMK1,RPS6KA6,ARRB2,ARRB1,AKT1,MAPK3,PIK3R6,RPS6KA4,IRS2,PIK3R2,FGA,ITGB5
EGF Signaling	1.33	0.167	3.464	SHC1,PIK3C2B,SRC,FOS,AKT2,AKT1,JUN,MAPK3,PIK3R6,IRS2,PIK3R2,MAPK12
Role of PI3K/AKT Signaling in the Pathogenesis of Influenza	1.31	0.16	2.496	PIK3C2B,RELA,AKT2,NFKBIE,NFKB2,GNAI2,AKT1,NFKBIA,MAP2K2,MAPK3,PIK3R6,IRS2,PIK3R2
3-phosphoinositide Biosynthesis	1.31	0.127	NaN	SOCS3,DUSP8,PPP1R12C,NUDT9,NUDT3,PPFIBP2,PPP2R5B,PTPRF,DUSP5,IRS2,PIK3R2,PALD1,PPP1CA,ALPL,PDGFRB,DUSP28,PIK3C2B,PPP1R14A,PTPRM,PI4K2A,PIP5K1C,DUSP1,CDIPT,SSH3,PIK3R6,SIRPA,PIP4K2C
Virus Entry via Endocytic Pathways	1.31	0.148	NaN	SRC,PIK3C2B,HLA-A,CLTB,CLTC,AP2S1,CD55,ACTA2,PLCG2,PIK3R6,PRKCH,IRS2,PIK3R2,ITGB6,ITGB5,DNM2
Melanocyte Development and Pigmentation Signaling	1.31	0.152	3.357	SRC,PIK3C2B,ADCY4,ADCY9,SHC1,RPS6KA6,MAP2K2,MAPK3,PLCG2,PIK3R6,PRKACA,ATF4,RPS6KA4,IRS2,PIK3R2
Dendritic Cell Maturation	1.31	0.13	5	RELA,PIK3C2B,AKT2,HLA-A,TNFRSF1A,NFKBIE,RELB,IKBKE,NFKB2,MAPK12,COL5A3,AKT1,NFKBIA,NGFR,PLCG2,FSCN1,MAPK3,PIK3R6,ATF4,PLCB3,IRS2,PIK3R2,LTBR,COL11A2,COL3A1
Basal Cell Carcinoma Signaling	1.3	0.164	2.53	FZD8,BMP4,GLIS2,WNT9A,DVL1,SMO,DVL3,FZD1,TCF3,FZD2,FZD7,BMP1
PKCθ Signaling in T Lymphocytes	1.27	0.139	4.359	PIK3C2B,RELA,MAP3K11,HLA-A,NFKBIE,IKBKE,NFATC4,NFKB2,FOS,JUN,NFKBIA,BCL10,VAV3,MAPK3,PLCG2,PIK3R6,IRS2,PIK3R2,CAMK2B
Role of PKR in Interferon Induction and Antiviral Response	1.26	0.195	NaN	FADD,RELA,NFKBIA,AKT1,TNFRSF1A,NFKBIE,IKBKE,NFKB2
Thyroid Cancer Signaling	1.26	0.195	NaN	SHC1,RXRG,NTF3,MAP2K2,MAPK3,NGF,RXRA,TCF3
Reelin Signaling in Neurons	1.25	0.152	NaN	APOE,SRC,PIK3C2B,MAP3K11,ARHGEF15,ARHGEF1,MAPK12,MAPK8IP1,ARHGEF5,AKT1,MAPT,PIK3R6,IRS2,PIK3R2
ERK5 Signaling	1.25	0.167	2.111	CTF1,SRC,FOS,RPS6KA6,AKT1,MEF2D,GNA12,FOXO3,ATF4,RPS6KA4,NGF
UVB-Induced MAPK Signaling	1.25	0.167	NaN	PIK3C2B,FOS,AKT1,JUN,MAPK3,PIK3R6,PRKCH,IRS2,PIK3R2,MAPK12,EIF4EBP1
IL-2 Signaling	1.25	0.167	3.162	SHC1,PIK3C2B,FOS,AKT2,AKT1,JUN,MAP2K2,MAPK3,PIK3R6,IRS2,PIK3R2
LPS/IL-1 Mediated Inhibition of RXR Function	1.25	0.124	-1.265	APOE,CHST7,ALAS1,HMGCS2,SLC27A4,ABCA1,SOD3,CHST2,HS6ST1,JUN,SCARB1,NGFR,ACSL4,HS3ST1,CPT1C,HMGCS1,TNFRSF1A,MGMT,GSTO1,CHST1,NR1H2,ALDH1L2,ALDH1A2,SLC27A1,ACOX3,RXRA,ALDH16A1,MGST3
Glioma Signaling	1.25	0.142	3.5	PIK3C2B,AKT2,CAMK1,CDKN2C,PDGFB,SHC1,AKT1,MAP2K2,MAPK3,PLCG2,CDKN1A,PIK3R6,PRKCH,IRS2,PIK3R2,CAMK2B,PDGFRB
Rac Signaling	1.25	0.142	4	PIK3C2B,RELA,MAP3K11,PAK6,ARPC5L,NFKB2,ANK1,LIMK1,JUN,MAP2K2,PIP5K1C,MAPK3,PIK3R6,ARPC3,IRS2,PIK3R2,PIP4K2C
Ephrin B Signaling	1.25	0.16	1.89	GNAI2,PXN,EPHB4,RGS3,GNG11,CXCR4,VAV3,MAPK3,GNA12,EFNB1,GNA11,LIMK1
mTOR Signaling	1.24	0.126	2.4	ULK1,PRKAB1,PPP2R5B,VEGFB,EIF4EBP1,HMOX1,AKT1,RHOG,RHOB,MAPK3,PPM1J,IRS2,PIK3R2,PIK3C2B,AKT2,PLD3,DDIT4,RHOJ,FAU,EIF3G,EIF3F,RPS6KA6,PIK3R6,PRKCH,RPS6KA4,EIF3K
Aldosterone Signaling in Epithelial Cells	1.23	0.129	3.317	PIK3C2B,CRYAB,DNAJB12,HSPB8,DNAJB2,DNAJB9,HSPA2,MAP2K2,PIP5K1C,DNAJC4,DUSP1,MAPK3,DNAJB11,PLCG2,PIK3R6,HSP90AA1,PLCB3,PRKCH,HSPB7,IRS2,PIK3R2,HSPB6,PIP4K2C
PAK Signaling	1.21	0.146	2.84	PIK3C2B,PXN,PAK6,MAPK12,GIT1,PDGFB,MYL1,LIMK1,SHC1,MAP2K2,MAPK3,PIK3R6,IRS2,PIK3R2,PDGFRB
IL-17 Signaling	1.21	0.153	NaN	RELA,PIK3C2B,AKT2,AKT1,JUN,MAP2K2,MAPK3,PIK3R6,IRS2,PIK3R2,NOS2,MAPKAPK2,MAPK12
Huntington's Disease Signaling	1.2	0.12	3.771	CLTB,GNA11,Ubb,HDAC10,NGF,SHC1,GNG11,AKT1,JUN,HDAC11,MAPK3,CASQ1,ATF4,IRS2,PIK3R2,DNM2,PIK3C2B,AKT2,HDAC4,CLTC,HSPA2,HDAC5,PSME1,CAPNS1,CAPN1,PIK3R6,PLCB3,PRKCH,UBC,SNCA
TWEAK Signaling	1.19	0.2	1.134	FADD,RELA,TRADD,NFKBIA,NFKBIE,IKBKE,NFKB2
UVC-Induced MAPK Signaling	1.19	0.186	2.828	SRC,FOS,JUN,MAP2K2,MAPK3,PRKCH,SMPD1,MAPK12
IL-15 Signaling	1.18	0.156	NaN	RELA,SHC1,PIK3C2B,AKT2,AKT1,MAP2K2,MAPK3,PIK3R6,IRS2,PIK3R2,NFKB2,MAPK12
G-Protein Coupled Receptor Signaling	1.18	0.117	NaN	RELA,NFKBIE,ADCY4,TBXA2R,GNA11,PDE4A,SHC1,NFKBIA,AKT1,MAP2K2,MAPK3,RGS10,ATF4,IRS2,PIK3R2,ADRA1B,CAMK2B,SMPDL3A,SRC,PIK3C2B,AKT2,APLNR,IKBKE,RAPGEF3,NFKB2,GNAI2,ADCY9,DUSP1,PDE1B,PRKACA,PIK3R6,PLCB3,ADORA2A
Androgen Signaling	1.17	0.14	2.53	SRC,RELA,CALR,GNA12,GNA11,NFKB2,GNAI2,SHC1,JUN,GNG11,AR,GTF2H4,MAPK3,PRKACA,HSP90AA1,PRKCH
T Cell Receptor Signaling	1.17	0.14	NaN	PIK3C2B,RELA,CSK,IKBKE,NFATC4,NFKB2,FOS,JUN,NFKBIA,MAP2K2,BCL10,VAV3,MAPK3,PIK3R6,IRS2,PIK3R2
Actin Cytoskeleton Signaling	1.17	0.121	3.4	ARHGEF1,BCAR1,LIMK1,SHC1,MAP2K2,MAPK3,ARPC3,IRS2,PIK3R2,TMSB10/TMSB4X,MATK,PIK3C2B,FGF16,PXN,PAK6,ARPC5L,GNA12,CSK,GSN,GIT1,MYL1,PDGFB,ACTA2,PIP5K1C,VAV3,SSH3,PIK3R6,PIP4K2C
Thrombopoietin Signaling	1.17	0.159	3.317	SHC1,PIK3C2B,FOS,JUN,MAP2K2,PLCG2,MAPK3,PIK3R6,PRKCH,IRS2,PIK3R2
ErbB2-ErbB3 Signaling	1.17	0.159	2.333	SHC1,PIK3C2B,AKT1,JUN,MAP2K2,MAPK3,PIK3R6,GSK3A,IRS2,CDKN1B,PIK3R2
PDGF Signaling	1.16	0.146	3.742	SRC,PIK3C2B,INPPL1,PDGFB,SHC1,FOS,JUN,MAP2K2,MAPK3,PLCG2,PIK3R6,IRS2,PIK3R2,PDGFRB
Protein Kinase A Signaling	1.16	0.11	0.649	RELA,DUSP8,ADCY4,NFKBIE,PDE4A,GSK3A,NOS3,NTN1,PTPRF,TGFBR2,DUSP5,NFKBIA,GNG11,MAP2K2,TGFB1,NGFR,MAPK3,SMO,ATF4,DUSP7,PGP,PPP1CA,EYA2,CAMK2B,SMPDL3A,PPP1R14C,PXN,PTPN18,PPP1R14A,NFKB2,NFATC4,TCF3,PTPRM,MYL1,GNAI2,ADCY9,DUSP1,PLCG2,PDE1B,PRKACA,PTPRS,PLCB3,PRKCH,H1f0,SIRPA
HER-2 Signaling in Breast Cancer	1.13	0.148	NaN	PIK3C2B,AKT2,MMP2,GSK3A,AKT1,CDKN1A,PIK3R6,PRKCH,IRS2,PIK3R2,CDKN1B,ITGB6,ITGB5
Semaphorin Signaling in Neurons	1.12	0.17	NaN	PLXNA1,RHOG,FES,RHOB,PAK6,MAPK3,RHOJ,LIMK1,SEMA7A
Cardiac Hypertrophy Signaling	1.11	0.118	4.536	MAP3K11,ADCY4,GNA11,TGFBR2,GNG11,AKT1,JUN,RHOG,MAP2K2,RHOB,TGFB1,MAPK3,IRS2,PIK3R2,MAPKAPK2,ADRA1B,PIK3C2B,GNA12,RHOJ,NFATC4,MAPK12,MYL1,GNAI2,ADCY9,MEF2D,PLCG2,PRKACA,PIK3R6,PLCB3
Ephrin A Signaling	1.11	0.161	NaN	PIK3C2B,VAV3,NGFR,PIK3R6,IRS2,PIK3R2,EPHA2,BCAR1,EFNA1,LIMK1
ErbB Signaling	1.11	0.143	NaN	PIK3C2B,PAK6,MAPK12,SHC1,FOS,JUN,AKT1,MAP2K2,MAPK3,PLCG2,PIK3R6,IRS2,PRKCH,PIK3R2
Hereditary Breast Cancer Signaling	1.1	0.13	NaN	PIK3C2B,AKT2,HDAC4,TUBG1,HDAC10,SMARCD2,Ubb,SMARCD1,HDAC5,FANCE,AKT1,HDAC11,CDKN1A,PIK3R6,BRCA2,IRS2,SMARCC2,PIK3R2,UBC
Th1 and Th2 Activation Pathway	1.08	0.124	NaN	SOCS3,PIK3C2B,IL4R,NOTCH3,JAG2,HLA-A,CXCR4,IFNGR2,PSEN2,IFNGR1,CRLF2,NFATC4,TGFBR2,NFIL3,NOTCH4,JUN,TGFB1,PIK3R6,IRS2,IL27RA,PIK3R2,NOTCH1,DLL4
Fcγ Receptor-mediated Phagocytosis in Macrophages and Monocytes	1.08	0.141	3.207	SRC,PXN,AKT2,PLD3,ARPC5L,HMOX1,AKT1,ACTA2,RAB11B,VAV3,MAPK3,ARPC3,PRKCH,PIK3R2
Apoptosis Signaling	1.08	0.144	0	RELA,CAPNS1,NFKBIA,MAP2K2,TNFRSF1A,MAPK3,PLCG2,NFKBIE,CAPN1,LMNA,IKBKE,NFKB2,MAP4K4
Creatine-phosphate Biosynthesis	1.07	0.333	NaN	CKB,CKMT2,MAP4K4
Retinoate Biosynthesis I	1.06	0.184	NaN	Akr1b10,DHRS3,RBP7,RDH10,ALDH1A2,RBP1,DHRS4
p38 MAPK Signaling	1.06	0.134	2.887	TNFRSF1A,MKNK2,MAPK12,FADD,TGFBR2,TRADD,RPS6KA6,TGFB1,DUSP1,MEF2D,MAPT,PLA2G5,ATF4,RPS6KA4,HSPB7,MAPKAPK2
D-myo-inositol-5-phosphate Metabolism	1.05	0.125	NaN	DUSP28,SOCS3,DUSP8,PPP1R12C,NUDT3,NUDT9,PPFIBP2,PPP2R5B,PPP1R14A,PTPRM,PTPRF,DUSP5,DUSP1,PLCG2,SSH3,PLCB3,PALD1,PPP1CA,ALPL,SIRPA,PIP4K2C
fMLP Signaling in Neutrophils	1.02	0.131	3.153	PIK3C2B,RELA,ARPC5L,NFKBIE,NFATC4,NFKB2,GNAI2,GNG11,NFKBIA,MAP2K2,MAPK3,PIK3R6,PLCB3,ARPC3,PRKCH,IRS2,PIK3R2
Regulation of Actin-based Motility by Rho	1.02	0.141	2.309	PAK6,ARPC5L,RHOJ,GSN,MYL1,LIMK1,RHOG,ACTA2,RHOB,PIP5K1C,ARPC3,ARHGDIA,PIP4K2C
IL-3 Signaling	1.02	0.145	3.464	SHC1,PIK3C2B,FOS,AKT2,AKT1,JUN,MAP2K2,MAPK3,PIK3R6,PRKCH,IRS2,PIK3R2
Glutathione Redox Reactions I	1.02	0.194	NaN	GPX1,GPX4,Gstt1,GPX7,MGST3,PRDX6
ErbB4 Signaling	1.02	0.149	3.162	SHC1,PIK3C2B,AKT1,MAP2K2,PLCG2,MAPK3,PIK3R6,PRKCH,PSEN2,IRS2,PIK3R2
Neuregulin Signaling	1	0.14	2.309	SRC,AKT2,DCN,SHC1,AKT1,MAP2K2,MAPK3,PLCG2,HSP90AA1,PRKCH,PIK3R2,CDKN1B,MATK
Type I Diabetes Mellitus Signaling	1	0.134	3.051	SOCS3,RELA,HLA-A,TNFRSF1A,NFKBIE,IFNGR2,IKBKE,IFNGR1,NFKB2,MAPK12,FADD,TRADD,NFKBIA,NGFR,NOS2
eNOS Signaling	1	0.122	3.3	PIK3C2B,AQP7,AKT2,PRKAB1,GUCY1A3,ADCY4,VEGFB,AQP1,NOS3,HSPA2,ADCY9,NOSIP,AKT1,PLCG2,PRKACA,PIK3R6,GUCY1A2,HSP90AA1,PRKCH,IRS2,PIK3R2,DNM2
Melanoma Signaling	0.989	0.158	NaN	PIK3C2B,AKT2,AKT1,MAP2K2,MAPK3,CDKN1A,PIK3R6,IRS2,PIK3R2
Pyridoxal 5'-phosphate Salvage Pathway	0.989	0.147	NaN	CDK18,AKT2,DAPK1,DMPK,MAP2K2,PIM1,MAPK3,GRK6,PLK1,PRKCH,LIMK1
IL-22 Signaling	0.98	0.208	1.342	SOCS3,AKT2,AKT1,MAPK3,MAPK12
Superoxide Radicals Degradation	0.976	0.3	NaN	CYGB,GPX7,SOD3
The Visual Cycle	0.976	0.188	NaN	Akr1b10,DHRS3,RBP7,RDH10,RBP1,DHRS4
Toll-like Receptor Signaling	0.962	0.145	0.816	SIGIRR,RELA,FOS,NFKBIA,JUN,TRAF4,Ubb,NFKB2,UBC,MAPK12,MAP4K4
Docosahexaenoic Acid (DHA) Signaling	0.959	0.155	NaN	PIK3C2B,AKT2,AKT1,SERPINF1,PIK3R6,GSK3A,IRS2,PIK3R2,PNPLA2
Prolactin Signaling	0.943	0.14	2.887	SHC1,PIK3C2B,SOCS3,FOS,JUN,MAP2K2,PLCG2,MAPK3,PIK3R6,PRKCH,IRS2,PIK3R2
Role of Wnt/GSK-3β Signaling in the Pathogenesis of Influenza	0.936	0.143	2.828	CSNK1E,FZD8,CSNK1G2,WNT9A,DVL1,SMO,DVL3,FZD1,TCF3,FZD2,FZD7
BMP signaling pathway	0.936	0.143	2.714	RELA,BMP4,JUN,MAP2K2,MAPK3,PRKACA,NFKB2,MAPK12,SMAD1,SMURF1,BMP1
IL-17A Signaling in Gastric Cells	0.929	0.2	NaN	RELA,FOS,JUN,MAPK3,MAPK12
Growth Hormone Signaling	0.919	0.138	1.732	PIK3C2B,SOCS3,FOS,RPS6KA6,PLCG2,MAPK3,PIK3R6,RPS6KA4,PRKCH,IRS2,PIK3R2,A2M
Nitric Oxide Signaling in the Cardiovascular System	0.912	0.127	3.5	PIK3C2B,AKT2,GUCY1A3,VEGFB,NOS3,AKT1,MAP2K2,MAPK3,PDE1B,PRKACA,PIK3R6,GUCY1A2,HSP90AA1,IRS2,PRKCH,PIK3R2
Synaptic Long Term Depression	0.911	0.122	3.441	PLA2G16,GUCY1A3,GNA12,PPP2R5B,GNA11,NOS3,PLBD1,GNAI2,MAP2K2,MAPK3,NPR1,PLCG2,PPM1J,PLA2G5,GUCY1A2,PLCB3,PRKCH,NOS2,NPR2
UVA-Induced MAPK Signaling	0.9	0.131	2.887	PIK3C2B,ART1,SMPD1,MAPK12,FOS,RPS6KA6,JUN,MAPK3,PLCG2,PIK3R6,PLCB3,RPS6KA4,IRS2,PIK3R2
Dopamine-DARPP32 Feedback in cAMP Signaling	0.899	0.119	1.528	KCNJ12,KCNJ8,PPP1R14C,GUCY1A3,CSNK1G2,ADCY4,PPP2R5B,PPP1R14A,KCNJ11,GRINA,CSNK1E,GNAI2,ADCY9,PPM1J,PLCG2,PRKACA,GUCY1A2,PLCB3,ATF4,PRKCH,PPP1CA
Bladder Cancer Signaling	0.898	0.136	NaN	FGF16,DAPK1,MMP23B,MMP28,MAP2K2,MMP14,MAPK3,MMP15,CDKN1A,VEGFB,MMP2,MMP11
G Beta Gamma Signaling	0.887	0.133	3.606	SRC,AKT2,GNA12,GNA11,GNAI2,SHC1,AKT1,GNG11,MAPK3,PLCG2,PRKACA,PRKCH,DNM2
Antiproliferative Role of TOB in T Cell Signaling	0.882	0.192	NaN	TGFBR2,PABPC4,TGFB1,TOB1,CDKN1B
PXR/RXR Activation	0.879	0.143	NaN	RELA,SCD,AKT2,AKT1,PCK2,FOXO3,PRKACA,ALAS1,RXRA,HMGCS2
Agrin Interactions at Neuromuscular Junction	0.879	0.143	2.121	SRC,PXN,JUN,ACTA2,PAK6,MAPK3,DVL1,RAPSN,DAG1,MAPK12
iCOS-iCOSL Signaling in T Helper Cells	0.879	0.125	3.207	PIK3C2B,RELA,AKT2,HLA-A,CSK,NFKBIE,IKBKE,NFATC4,NFKB2,SHC1,AKT1,NFKBIA,PIK3R6,IRS2,PIK3R2,CAMK2B
D-myo-inositol (1,4,5,6)-Tetrakisphosphate Biosynthesis	0.862	0.121	NaN	DUSP28,SOCS3,DUSP8,PPP1R12C,NUDT3,NUDT9,PPFIBP2,PPP2R5B,PPP1R14A,PTPRM,PTPRF,DUSP5,DUSP1,SSH3,PALD1,PPP1CA,ALPL,SIRPA
D-myo-inositol (3,4,5,6)-tetrakisphosphate Biosynthesis	0.862	0.121	NaN	DUSP28,SOCS3,DUSP8,PPP1R12C,NUDT3,NUDT9,PPFIBP2,PPP2R5B,PPP1R14A,PTPRM,PTPRF,DUSP5,DUSP1,SSH3,PALD1,PPP1CA,ALPL,SIRPA
Neuropathic Pain Signaling In Dorsal Horn Neurons	0.862	0.126	3.873	SRC,PIK3C2B,CAMK1,KCNH2,GRINA,FOS,MAPK3,PLCG2,PRKACA,PIK3R6,PLCB3,PRKCH,IRS2,PIK3R2,CAMK2B
Role of JAK1 and JAK3 in γc Cytokine Signaling	0.854	0.141	NaN	SHC1,PIK3C2B,SOCS3,IL4R,FES,MAPK3,PIK3R6,IRS2,CRLF2,PIK3R2
Role of RIG1-like Receptors in Antiviral Innate Immunity	0.844	0.159	2.236	FADD,RELA,NFKBIA,NFKBIE,MAVS,IKBKE,NFKB2
Role of IL-17F in Allergic Inflammatory Airway Diseases	0.844	0.159	1.89	RELA,RPS6KA6,MAP2K2,MAPK3,ATF4,RPS6KA4,NFKB2
Macropinocytosis Signaling	0.843	0.136	2.646	PIK3C2B,SRC,PLCG2,PIK3R6,PRKCH,IRS2,PIK3R2,NGF,ITGB6,PDGFB,ITGB5
Activation of IRF by Cytosolic Pattern Recognition Receptors	0.817	0.143	1.667	FADD,RELA,NFKBIA,JUN,NFKBIE,MAVS,IKBKE,NFKB2,MAPK12
CNTF Signaling	0.817	0.143	2.333	PIK3C2B,RPS6KA6,AKT1,MAP2K2,MAPK3,PIK3R6,RPS6KA4,IRS2,PIK3R2
Ethanol Degradation IV	0.817	0.167	NaN	ALDH2,ALDH1L2,ALDH1A2,ACSS1,CYGB,GPX7
IL-9 Signaling	0.81	0.156	1.89	RELA,PIK3C2B,SOCS3,PIK3R6,IRS2,PIK3R2,NFKB2
Non-Small Cell Lung Cancer Signaling	0.791	0.133	2.333	RXRG,PIK3C2B,AKT2,AKT1,MAP2K2,MAPK3,FOXO3,PIK3R6,IRS2,PIK3R2,RXRA
Paxillin Signaling	0.782	0.124	2.111	SRC,PIK3C2B,PXN,PAK6,CSK,MAPK12,BCAR1,ACTA2,PIK3R6,IRS2,PIK3R2,ITGB6,ITGA7,ITGB5
3-phosphoinositide Degradation	0.782	0.116	NaN	DUSP28,SOCS3,DUSP8,PPP1R12C,NUDT3,NUDT9,PPFIBP2,PPP2R5B,PPP1R14A,INPPL1,PTPRM,PTPRF,DUSP5,DUSP1,SSH3,PALD1,PPP1CA,ALPL,SIRPA
MIF-mediated Glucocorticoid Regulation	0.782	0.162	2.449	RELA,NFKBIA,MAPK3,NFKBIE,PLA2G5,NFKB2
D-myo-inositol (1,4,5)-Trisphosphate Biosynthesis	0.782	0.162	NaN	PI4K2A,PIP5K1C,PLCG2,CDIPT,PLCB3,PIP4K2C
Hypoxia Signaling in the Cardiovascular System	0.781	0.135	2.449	NFKBIA,AKT1,JUN,NFKBIE,HSP90AA1,UBE2Z,ATF4,NOS3,UBE2O,UBE2C
Alanine Degradation III	0.771	0.333	NaN	GPT,GPT2
Alanine Biosynthesis II	0.771	0.333	NaN	GPT,GPT2
FGF Signaling	0.771	0.128	3.464	PIK3C2B,FGF16,AKT2,AKT1,MAPK3,PIK3R6,ATF4,IRS2,FGFRL1,PIK3R2,MAPKAPK2,MAPK12
TR/RXR Activation	0.745	0.124	NaN	PIK3C2B,AKT2,UCP2,THRA,THRSP,RXRG,AKT1,SCARB1,PIK3R6,IRS2,PIK3R2,RXRA,FGA
Mitochondrial L-carnitine Shuttle Pathway	0.744	0.19	NaN	ACSL4,SLC27A1,CPT1C,SLC27A4
Mitotic Roles of Polo-Like Kinase	0.744	0.136	0	FZR1,TGFB1,PTTG1,CAPN1,PPM1J,PPP2R5B,CDC7,HSP90AA1,PLK1
Endometrial Cancer Signaling	0.744	0.136	NaN	PIK3C2B,AKT2,AKT1,MAP2K2,MAPK3,FOXO3,PIK3R6,IRS2,PIK3R2
Tight Junction Signaling	0.741	0.114	NaN	RELA,AKT2,TNFRSF1A,PPP2R5B,NFKB2,CNKSR3,MYL1,SMURF1,TGFBR2,F11R,FOS,CLDN5,JUN,AKT1,ACTA2,TGFB1,NGFR,PPM1J,PRKACA
Th1 Pathway	0.741	0.118	3.357	SOCS3,PIK3C2B,NOTCH3,HLA-A,IFNGR2,IFNGR1,PSEN2,NFATC4,NFIL3,NOTCH4,PIK3R6,IRS2,IL27RA,PIK3R2,NOTCH1,DLL4
FcγRIIB Signaling in B Lymphocytes	0.732	0.14	2.828	SHC1,PIK3C2B,AKT1,PLCG2,PIK3R6,IRS2,PIK3R2,MAPK12
Chondroitin Sulfate Degradation (Metazoa)	0.694	0.182	NaN	HYAL2,GM2A,HEXA,ARSB
Dermatan Sulfate Degradation (Metazoa)	0.694	0.182	NaN	HYAL2,GM2A,HEXA,FGFRL1
Glycoaminoglycan-protein Linkage Region Biosynthesis	0.692	0.214	NaN	XYLT2,XYLT1,B3GAT3
Retinol Biosynthesis	0.69	0.143	NaN	Akr1b10,DHRS3,RBP7,RDH10,RBP1,PNPLA2,DHRS4
Cyclins and Cell Cycle Regulation	0.689	0.128	-2.449	HDAC4,TGFB1,HDAC11,PPM1J,CDKN1A,PPP2R5B,CDKN2C,HDAC10,CDKN1B,HDAC5
Sonic Hedgehog Signaling	0.682	0.161	1	DYRK1B,ARRB2,GLIS2,PRKACA,SMO
Th2 Pathway	0.681	0.113	2.84	SOCS3,PIK3C2B,IL4R,NOTCH3,JAG2,CXCR4,HLA-A,PSEN2,CRLF2,TGFBR2,NOTCH4,JUN,TGFB1,PIK3R6,IRS2,PIK3R2,NOTCH1
Thiosulfate Disproportionation III (Rhodanese)	0.677	0.286	NaN	MPST,TST
Regulation of eIF4 and p70S6K Signaling	0.674	0.112	2.111	PIK3C2B,AKT2,PPP2R5B,MAPK12,EIF4EBP1,FAU,EIF3G,SHC1,EIF3F,AKT1,MAP2K2,MAPK3,PPM1J,PIK3R6,IRS2,PIK3R2,EIF1AX,EIF3K
CREB Signaling in Neurons	0.674	0.109	4.243	PIK3C2B,AKT2,ADCY4,GNA12,GNA11,GNAI2,ADCY9,SHC1,AKT1,GNG11,MAP2K2,MAPK3,PLCG2,PRKACA,PIK3R6,PLCB3,ATF4,PRKCH,IRS2,PIK3R2,CAMK2B
CTLA4 Signaling in Cytotoxic T Lymphocytes	0.674	0.121	NaN	PIK3C2B,AKT2,AKT1,HLA-A,PPM1J,CLTB,CLTC,PPP2R5B,PIK3R6,IRS2,PIK3R2,AP2S1
Polyamine Regulation in Colon Cancer	0.656	0.174	NaN	PSME1,MXD1,OAZ1,OAZ2
Mechanisms of Viral Exit from Host Cells	0.655	0.146	NaN	CHMP6,ACTA2,CHMP2B,CHMP2A,PRKCH,VPS37C
Myc Mediated Apoptosis Signaling	0.652	0.129	NaN	FADD,SHC1,PIK3C2B,AKT2,AKT1,PIK3R6,IRS2,PIK3R2,MAPK12
IL-4 Signaling	0.629	0.121	NaN	SHC1,PIK3C2B,AKT2,IL4R,AKT1,HLA-A,PIK3R6,INPPL1,IRS2,PIK3R2,NFATC4
Role of JAK1, JAK2 and TYK2 in Interferon Signaling	0.613	0.167	NaN	RELA,IFNGR2,IFNGR1,NFKB2
γ-linolenate Biosynthesis II (Animals)	0.613	0.167	NaN	FADS2,ACSL4,SLC27A1,SLC27A4
Retinoate Biosynthesis II	0.594	0.25	NaN	RBP7,RBP1
Glycerol-3-phosphate Shuttle	0.594	0.25	NaN	GPD1,GPD1L
Fc Epsilon RI Signaling	0.574	0.112	3.207	PIK3C2B,AKT2,INPPL1,MAPK12,AKT1,MAP2K2,VAV3,MAPK3,PLCG2,PLA2G5,PIK3R6,IRS2,PRKCH,PIK3R2
T Helper Cell Differentiation	0.555	0.122	NaN	TGFBR2,IL4R,TNFRSF1A,TGFB1,HLA-A,NGFR,IFNGR2,IFNGR1,BCL6
Cell Cycle: G1/S Checkpoint Regulation	0.554	0.125	-0.378	HDAC4,TGFB1,HDAC11,CDKN1A,CDKN2C,HDAC10,CDKN1B,HDAC5
FXR/RXR Activation	0.553	0.109	NaN	APOE,AKT2,MLXIPL,SDC1,CYP27A1,VTN,SERPINF1,MAPK12,ALB,AKT1,PCK2,SCARB1,FGA,RXRA,AGT
Circadian Rhythm Signaling	0.547	0.143	NaN	CSNK1E,ARNTL,CRY2,ATF4,GRINA
Superpathway of Geranylgeranyldiphosphate Biosynthesis I (via Mevalonate)	0.547	0.143	NaN	FDPS,IDI1,HMGCR,HMGCS2,HMGCS1
Natural Killer Cell Signaling	0.547	0.11	NaN	PIK3C2B,AKT2,PAK6,INPPL1,SHC1,AKT1,MAP2K2,VAV3,MAPK3,PLCG2,PIK3R6,IRS2,PRKCH,PIK3R2
Protein Ubiquitination Pathway	0.547	0.1	NaN	FZR1,USP21,CRYAB,PSMA7,HLA-A,HSPB8,UBE2Z,Ubb,DNAJB2,UBE2O,SMURF1,DNAJC4,HSPB6,DNAJB12,USP19,USP30,PSMD3,DNAJB9,HSPA2,PSME1,DNAJB11,BAP1,HSP90AA1,HSPB7,UBC,TAP2,UBE2C
Granulocyte Adhesion and Diapedesis	0.547	0.105	NaN	SDC1,MMP28,TNFRSF1A,Ppbp,CXCR4,MMP14,MMP15,THY1,MMP2,SDC3,GNAI2,MMP23B,CLDN5,ICAM2,CDH5,SDC2,NGFR,CCL21,MMP11
Atherosclerosis Signaling	0.532	0.109	NaN	PLA2G16,RELA,APOE,CXCR4,NFKB2,PDGFB,PLBD1,ALB,COL5A3,LYZ,TGFB1,PLA2G5,COL11A2,COL3A1
Interferon Signaling	0.517	0.139	1.342	RELA,IFITM3,IFNGR2,IFNGR1,IFITM2
Synaptic Long Term Potentiation	0.517	0.109	2.138	PPP1R14C,GNA11,PPP1R14A,RAPGEF3,GRINA,MAP2K2,MAPK3,PLCG2,PRKACA,ATF4,PLCB3,PRKCH,PPP1CA,CAMK2B
Actin Nucleation by ARP-WASP Complex	0.514	0.125	1.89	PPP1R12C,RHOG,RHOB,ARPC5L,GNA12,ARPC3,RHOJ
Cancer Drug Resistance By Drug Efflux	0.514	0.125	NaN	FOXO4,AKT2,AKT1,MAP2K2,MAPK3,FOXO3,PIK3R2
Mevalonate Pathway I	0.504	0.148	NaN	IDI1,HMGCR,HMGCS2,HMGCS1
HIPPO signaling	0.493	0.114	-1.342	CSNK1E,PPP1R14C,PPM1J,PPP2R5B,SCRIB,PPP1R14A,TEAD3,PPP1CA,TEAD2,SMAD1
Amyotrophic Lateral Sclerosis Signaling	0.493	0.108	NaN	PIK3C2B,RAB5C,GPX1,VEGFB,RAB5B,GRINA,CCS,CAPNS1,CAPN1,PIK3R6,GLUL,IRS2,PIK3R2
Calcium Signaling	0.472	0.102	2.887	RAP2B,CALR,HDAC4,CAMK1,HDAC10,NFATC4,Tpm2,MYL1,HDAC5,GRINA,CABIN1,ACTA2,MAPK3,HDAC11,MEF2D,CASQ1,PRKACA,ATF4,CAMK2B
Trans, trans-farnesyl Diphosphate Biosynthesis	0.465	0.2	NaN	FDPS,IDI1
p53 Signaling	0.465	0.108	-0.577	PIK3C2B,AKT2,TP53INP1,BBC3,AKT1,JUN,CDKN1A,PIK3R6,PERP,IRS2,PIK3R2,DRAM1
Mitochondrial Dysfunction	0.462	0.101	NaN	FURIN,COX4I2,UCP2,NDUFS7,PRDX5,PSEN2,MAPK12,GPX7,FIS1,Cox8b,NDUFA11,NDUFS2,NDUFA3,CPT1C,GPX4,BACE2,UQCRC1,SNCA,PINK1
Cellular Effects of Sildenafil (Viagra)	0.462	0.104	NaN	GUCY1A3,ADCY4,PDE4A,NOS3,KCNH2,MYL1,ADCY9,ACTA2,PABPC4,PLCG2,PDE1B,PRKACA,GUCY1A2,CACNG7,PLCB3
Fatty Acid Activation	0.459	0.158	NaN	ACSL4,SLC27A1,SLC27A4
Gαi Signaling	0.452	0.106	1.155	SRC,APLNR,ADCY4,RALB,TBXA2R,GNAI2,SHC1,ADCY9,GNG11,MAPK3,RGS10,PRKACA,RALGDS
Phagosome Formation	0.452	0.106	NaN	PIK3C2B,MRC2,VTN,INPPL1,RHOJ,RHOG,RHOB,PLCG2,PIK3R6,PLCB3,PRKCH,IRS2,PIK3R2
Dopamine Receptor Signaling	0.446	0.11	0	ADCY9,PPP1R14C,COMT,PPM1J,ADCY4,PPP2R5B,PRKACA,PPP1R14A,SPR,PPP1CA
CCR3 Signaling in Eosinophils	0.438	0.104	NaN	PIK3C2B,PAK6,MAPK12,LIMK1,GNAI2,GNG11,MAP2K2,MAPK3,PLA2G5,PIK3R6,PLCB3,PRKCH,IRS2,PIK3R2
DNA Methylation and Transcriptional Repression Signaling	0.422	0.15	NaN	MTA1,MBD3,SUDS3
Agranulocyte Adhesion and Diapedesis	0.421	0.099	NaN	AOC3,MMP28,TNFRSF1A,Ppbp,CXCR4,MMP14,MMP15,MMP2,MYL1,GNAI2,MMP23B,CLDN5,ICAM2,PODXL2,ACTA2,CDH5,CCL21,MMP11,CD34
Assembly of RNA Polymerase I Complex	0.42	0.182	NaN	TAF1C,Polr1d
Heme Degradation	0.42	0.182	NaN	HMOX1,BLVRB
Phenylethylamine Degradation I	0.42	0.182	NaN	AOC3,ALDH2
Lanosterol Biosynthesis	0.42	0.333	NaN	LSS
Role of Pattern Recognition Receptors in Recognition of Bacteria and Viruses	0.417	0.102	3.464	PIK3C2B,RELA,C1QA,NFKB2,MAPK12,TGFB1,Il17d,MAPK3,PLCG2,PIK3R6,MAVS,PRKCH,IRS2,PIK3R2
Superpathway of Cholesterol Biosynthesis	0.405	0.108	NaN	FDPS,SQLE,IDI1,HSD17B7,LSS,HMGCR,HMGCS2,HMGCS1,CYP51A1
Endoplasmic Reticulum Stress Pathway	0.392	0.143	NaN	CALR,XBP1,ATF4
Chondroitin Sulfate Biosynthesis	0.392	0.11	NaN	CHST2,CHST1,HS6ST1,XYLT2,CHST7,XYLT1,HS3ST1,B3GAT3
Heparan Sulfate Biosynthesis	0.388	0.105	NaN	CHST2,CHST1,HS6ST1,XYLT2,CHST7,XYLT1,HS3ST1,B3GAT3,EXTL1,PRDX6
Dermatan Sulfate Biosynthesis	0.376	0.108	NaN	CHST2,CHST1,HS6ST1,XYLT2,CHST7,XYLT1,HS3ST1,B3GAT3
Glycogen Biosynthesis II (from UDP-D-Glucose)	0.376	0.167	NaN	GYG1,GBE1
N-acetylglucosamine Degradation II	0.376	0.167	NaN	NAGK,AMDHD2
Hepatic Cholestasis	0.368	0.0971	NaN	RELA,CYP27A1,TNFRSF1A,ADCY4,NFKBIE,IKBKE,NFKB2,MAPK12,ADCY9,JUN,NFKBIA,TGFB1,Il17d,NGFR,PRKACA,PRKCH,RXRA
Pentose Phosphate Pathway	0.363	0.136	NaN	TALDO1,TKTL1,H6PD
Role of MAPK Signaling in the Pathogenesis of Influenza	0.362	0.107	NaN	PLBD1,PLA2G16,AKT2,AKT1,MAP2K2,MAPK3,PLA2G5,MAPK12
Sperm Motility	0.36	0.0986	3.606	PLA2G16,CACNA1G,MAP3K11,GUCY1A3,PDE4A,PLBD1,NPR1,PLCG2,PDE1B,PLA2G5,PRKACA,GUCY1A2,PLCB3,PRKCH
Intrinsic Prothrombin Activation Pathway	0.358	0.116	1	COL5A3,COL11A2,FGA,THBD,COL3A1
Role of p14/p19ARF in Tumor Suppression	0.358	0.116	-2.236	PIK3C2B,PIK3R6,IRS2,PIK3R2,POLR3D
Oxidative Ethanol Degradation III	0.345	0.121	NaN	ALDH2,ALDH1L2,ALDH1A2,ACSS1
Tetrapyrrole Biosynthesis II	0.342	0.154	NaN	ALAD,ALAS1
Pentose Phosphate Pathway (Non-oxidative Branch)	0.342	0.154	NaN	TALDO1,TKTL1
Netrin Signaling	0.342	0.114	NaN	ABLIM3,PRKACA,ABLIM2,NFATC4,NTN1
Heme Biosynthesis II	0.342	0.13	NaN	FECH,ALAD,ALAS1
Methylglyoxal Degradation III	0.342	0.13	NaN	AKR7A2,Akr1b10,AKR1B1
Sulfite Oxidation IV	0.342	0.25	NaN	SUOX
Unfolded protein response	0.34	0.109	NaN	CALR,XBP1,ATF4,OS9,DNAJB9,HSPA2
Oncostatin M Signaling	0.329	0.118	NaN	SHC1,EPAS1,MAP2K2,MAPK3
Role of JAK2 in Hormone-like Cytokine Signaling	0.329	0.118	NaN	SHC1,SOCS3,IRS2,SIRPA
Role of BRCA1 in DNA Damage Response	0.327	0.103	1	FANCE,CDKN1A,SMARCD2,BRCA2,PLK1,SMARCC2,BABAM1,SMARCD1
Melatonin Signaling	0.327	0.103	2.121	GNAI2,MAP2K2,PLCG2,MAPK3,PRKACA,PLCB3,PRKCH,CAMK2B
Salvage Pathways of Pyrimidine Ribonucleotides	0.325	0.0982	NaN	CDK18,AKT2,DAPK1,DMPK,MAP2K2,PIM1,MAPK3,GRK6,PLK1,PRKCH,LIMK1
Role of JAK family kinases in IL-6-type Cytokine Signaling	0.289	0.12	NaN	SOCS3,MAPK3,MAPK12
Fatty Acid α-oxidation	0.289	0.12	NaN	ALDH2,ALDH1L2,ALDH1A2
Regulation of Cellular Mechanics by Calpain Protease	0.289	0.103	1.342	SRC,PXN,CAPNS1,MAPK3,CAPN1,CDKN1B
Ethanol Degradation II	0.288	0.106	NaN	ALDH2,ALDH1L2,ALDH1A2,ACSS1,DHRS4
GPCR-Mediated Integration of Enteroendocrine Signaling Exemplified by an L Cell	0.285	0.0988	NaN	GNAI2,ADCY9,GIPR,PLCG2,ADCY4,GNA11,PRKACA,PLCB3
Hypusine Biosynthesis	0.28	0.2	NaN	DOHH
Sorbitol Degradation I	0.28	0.2	NaN	SORD
GPCR-Mediated Nutrient Sensing in Enteroendocrine Cells	0.28	0.0968	NaN	GNAI2,ADCY9,GNG11,PLCG2,ADCY4,GNA11,PRKACA,PLCB3,PRKCH
Lipid Antigen Presentation by CD1	0.269	0.115	NaN	CALR,PSAP,AP2S1
EIF2 Signaling	0.255	0.0893	3.207	MYCN,PIK3C2B,AKT2,RPL26,FAU,EIF3G,SHC1,EIF3F,AKT1,MAP2K2,ACTA2,MAPK3,PIK3R6,ATF4,IRS2,RPL3L,PIK3R2,PPP1CA,EIF1AX,EIF3K
Phospholipases	0.254	0.0972	NaN	PLBD1,PLA2G16,HMOX1,PLD3,PLCG2,PLA2G5,PLCB3
Complement System	0.251	0.105	0	C1R,SERPING1,CD55,C1QA
Citrulline-Nitric Oxide Cycle	0.25	0.125	NaN	NOS3,NOS2
Parkinson's Signaling	0.25	0.125	NaN	MAPK12,SNCA
cAMP-mediated signaling	0.239	0.0881	3.13	SMPDL3A,SRC,CAMK1,APLNR,ADCY4,TBXA2R,PDE4A,RAPGEF3,GNAI2,ADCY9,MAP2K2,DUSP1,MAPK3,RGS10,PDE1B,PRKACA,ATF4,ADORA2A,PKIG,CAMK2B
α-Adrenergic Signaling	0.239	0.0928	2.121	GNAI2,ADCY9,GNG11,MAP2K2,PLCG2,MAPK3,ADCY4,PRKACA,PRKCH
Cholesterol Biosynthesis I	0.239	0.103	NaN	SQLE,HSD17B7,LSS,CYP51A1
Cholesterol Biosynthesis II (via 24,25-dihydrolanosterol)	0.239	0.103	NaN	SQLE,HSD17B7,LSS,CYP51A1
Cholesterol Biosynthesis III (via Desmosterol)	0.239	0.103	NaN	SQLE,HSD17B7,LSS,CYP51A1
Fatty Acid β-oxidation III (Unsaturated, Odd Number)	0.236	0.167	NaN	ECI1
CCR5 Signaling in Macrophages	0.236	0.0946	NaN	GNAI2,FOS,GNG11,JUN,PLCG2,PRKCH,MAPK12
IL-15 Production	0.235	0.107	NaN	RELA,MAP3K11,NFKB2
Cardiac β-adrenergic Signaling	0.235	0.0897	0	SMPDL3A,PPP1R14C,ADCY4,PPP2R5B,PDE4A,PPP1R14A,ADCY9,GNG11,PPM1J,PDE1B,PRKACA,PPP1CA,PKIG
Dermatan Sulfate Biosynthesis (Late Stages)	0.235	0.098	NaN	CHST2,CHST1,HS6ST1,CHST7,HS3ST1
GABA Receptor Signaling	0.226	0.0933	NaN	ADCY9,ADCY4,Ubb,GABARAP,KCNH2,UBC,AP2S1
TREM1 Signaling	0.213	0.0921	1.89	SIGIRR,RELA,AKT2,AKT1,PLCG2,MAPK3,NFKB2
Extrinsic Prothrombin Activation Pathway	0.205	0.111	NaN	FGA,THBD
Ketogenesis	0.205	0.111	NaN	HMGCS2,HMGCS1
Retinoic acid Mediated Apoptosis Signaling	0.205	0.0923	2	FADD,RXRG,ART1,TNFSF10,RXRA,RARG
Gαs Signaling	0.203	0.0885	3.162	ADCY9,SRC,GNG11,MAP2K2,MAPK3,ADCY4,PRKACA,ATF4,RAPGEF3,ADORA2A
Spermine Biosynthesis	0.201	0.143	NaN	AMD1
Glutamine Biosynthesis I	0.201	0.143	NaN	GLUL
Spermidine Biosynthesis I	0.201	0.143	NaN	AMD1
Glutathione-mediated Detoxification	0.199	0.0952	NaN	Gstt1,ANPEP,MGST3,GSTO1
Crosstalk between Dendritic Cells and Natural Killer Cells	0.198	0.0889	NaN	RELA,ACTA2,HLA-A,FSCN1,TNFSF10,LTBR,NFKB2,CAMK2B
Oleate Biosynthesis II (Animals)	0.189	0.105	NaN	SCD,FADS2
DNA damage-induced 14-3-3σ Signaling	0.189	0.105	NaN	AKT2,AKT1
Airway Pathology in Chronic Obstructive Pulmonary Disease	0.17	0.125	NaN	MMP2
NADH Repair	0.17	0.125	NaN	NAXE
Geranylgeranyldiphosphate Biosynthesis	0.17	0.125	NaN	FDPS
N-acetylglucosamine Degradation I	0.17	0.125	NaN	AMDHD2
nNOS Signaling in Skeletal Muscle Cells	0.17	0.1	NaN	SNTA1,DAG1
Noradrenaline and Adrenaline Degradation	0.165	0.0877	NaN	ALDH2,ALDH1L2,COMT,ALDH1A2,DHRS4
Fatty Acid β-oxidation I	0.162	0.0889	NaN	ACSL4,SLC27A1,SLC27A4,ECI1
Histamine Degradation	0.158	0.0909	NaN	ALDH2,ALDH1L2,ALDH1A2
Chondroitin Sulfate Biosynthesis (Late Stages)	0.155	0.0862	NaN	CHST2,CHST1,HS6ST1,CHST7,HS3ST1
Triacylglycerol Degradation	0.152	0.0847	NaN	DAGLA,MGLL,PNPLA2,PRDX6,ABHD16A
Heparan Sulfate Biosynthesis (Late Stages)	0.152	0.0833	NaN	CHST2,CHST1,HS6ST1,CHST7,HS3ST1,EXTL1,PRDX6
Epoxysqualene Biosynthesis	0.152	0.111	NaN	SQLE
Branched-chain α-keto acid Dehydrogenase Complex	0.152	0.111	NaN	BCKDHA
Thioredoxin Pathway	0.152	0.111	NaN	NXN
1,25-dihydroxyvitamin D3 Biosynthesis	0.152	0.111	NaN	CYP2R1
L-cysteine Degradation III	0.152	0.111	NaN	MPST
Myo-inositol Biosynthesis	0.152	0.111	NaN	ISYNA1
Glycine Degradation (Creatine Biosynthesis)	0.152	0.111	NaN	GAMT
Lactose Degradation III	0.152	0.111	NaN	PSAP
Gluconeogenesis I	0.149	0.0851	NaN	ENO3,ME3,PGAM2,FBP2
Choline Biosynthesis III	0.149	0.0909	NaN	HMOX1,PLD3
Zymosterol Biosynthesis	0.149	0.0909	NaN	HSD17B7,CYP51A1
Glucocorticoid Biosynthesis	0.149	0.0909	NaN	Cyp2d22,HSD3B2
Mineralocorticoid Biosynthesis	0.149	0.0909	NaN	Cyp2d22,HSD3B2
Coagulation System	0.149	0.0857	NaN	FGA,THBD,A2M
Cell Cycle Regulation by BTG Family Proteins	0.149	0.0857	NaN	PPM1J,BTG2,PPP2R5B
G Protein Signaling Mediated by Tubby	0.149	0.0857	NaN	GNG11,PLCG2,PLCB3
Tryptophan Degradation X (Mammalian, via Tryptamine)	0.149	0.0857	NaN	ALDH2,ALDH1L2,ALDH1A2
Putrescine Degradation III	0.149	0.0857	NaN	ALDH2,ALDH1L2,ALDH1A2
MSP-RON Signaling Pathway	0.149	0.0822	NaN	PIK3C2B,ACTA2,PIK3R6,IRS2,PIK3R2,NOS2
Vitamin-C Transport	0.139	0.087	NaN	NXN,GSTO1
Inflammasome pathway	0.139	0.087	NaN	CTSB,NFKB2
Pentose Phosphate Pathway (Oxidative Branch)	0.139	0.1	NaN	H6PD
Acetate Conversion to Acetyl-CoA	0.139	0.1	NaN	ACSS1
Estrogen-mediated S-phase Entry	0.124	0.0833	NaN	CDKN1A,CDKN1B
Heme Biosynthesis from Uroporphyrinogen-III I	0.118	0.0909	NaN	FECH
Tetrahydrobiopterin Biosynthesis I	0.118	0.0909	NaN	SPR
Rapoport-Luebering Glycolytic Shunt	0.118	0.0909	NaN	PGAM2
Diphthamide Biosynthesis	0.0997	0.0833	NaN	EEF2
Ascorbate Recycling (Cytosolic)	0.0997	0.0833	NaN	GSTO1
Biotin-carboxyl Carrier Protein Assembly	0.0997	0.0833	NaN	ACACB
Tetrahydrobiopterin Biosynthesis II	0.0997	0.0833	NaN	SPR
